1 **Two Active X-chromosomes Modulate the Growth, Pluripotency Exit and DNA**  
2 **Methylation Landscape of Mouse Naive Pluripotent Stem Cells through Different**  
3 **Pathways**

4  
5 Juan Song<sup>1</sup>, Adrian Janiszewski<sup>1</sup>, Natalie De Geest<sup>1</sup>, Lotte Vanheer<sup>1</sup>, Irene Talon<sup>1</sup>, Taeho Oh<sup>1</sup>,  
6 Vincent Pasque<sup>1,\*</sup>.

7  
8 <sup>1</sup> KU Leuven - University of Leuven, Department of Development and Regeneration, Herestraat  
9 49, B-3000 Leuven, Belgium.

10  
11

12 \* Correspondence to: [vincent.pasque@kuleuven.be](mailto:vincent.pasque@kuleuven.be) (V.P.)

13  
14 **Format:** Research paper

15

16 **ABSTRACT**

17 Sex is an increasingly important feature of mouse naive pluripotent stem cells (PSCs), but the  
18 regulatory processes involved remain enigmatic. Here, we addressed how sex modulates  
19 pluripotency by characterizing the transcriptional state, differentiation dynamics, growth and  
20 DNA methylation in female ESCs with heterozygous deletions of *Dusp9*. Our results show that  
21 sex-specific regulation of DNA methylation by *Dusp9* can be molecularly uncoupled from the  
22 regulation of sex-specific differences in growth, transcription and pluripotency exit. We also  
23 addressed how sex modulates pluripotency by characterizing, in male and female cells, the  
24 transcriptional state and differentiation dynamics of iPSCs. We found that iPSCs adopt distinct  
25 sex-specific transcriptional states, pluripotency exit kinetics and growth properties, which  
26 correlate with the presence of two active X chromosomes. Differences in growth and  
27 pluripotency exit are not explained by X-linked pluripotency genes. We also examined the open  
28 chromatin landscape of embryonic stem cells (ESCs). Epigenomic profiling revealed sex-  
29 specific open chromatin landscapes associated with pluripotency and development that underlie  
30 key pluripotency and signaling transcription factor binding sites. The differential enrichment of  
31 binding sites in sex-specific open chromatin regions provides a molecular link between  
32 transcriptional regulators, maintenance of and exit from pluripotency. Our results uncover that  
33 different pathways regulate distinct sex-specific differences in PSCs and reveal new molecular  
34 insights on sex-specific cellular states.

35

36

37

38

39

40

41

42

## 1 INTRODUCTION

2 Pluripotent stem cells (PSCs) are important for modeling development and diseases and for the  
3 design of future regenerative medicine approaches [1]. A key question in the field is what  
4 mechanisms underlie the establishment and maintenance of pluripotency. Somatic cells can be  
5 reprogrammed into induced PSCs (iPSCs) by transcription factor overexpression [2] and mouse  
6 embryonic stem cells (ESCs) can be derived directly from early embryos [3]. Both cell types  
7 have the capacity to self-renew and maintain embryonic lineage differentiation potential in  
8 culture [4]. It is of outstanding interest to understand what epigenetic and genetic mechanisms  
9 influence the molecular and functional properties of PSCs.

10 Increasing evidence suggests that X-chromosome dosage can modulate the molecular and  
11 functional properties of mammalian PSCs [5–16]. Female cells undergo X-chromosome  
12 reactivation in the mouse inner cell mass resulting in two active X-chromosomes (XaXa), a state  
13 maintained in female ESCs and induced by reprogramming to iPSCs [17–19], reviewed in [20].  
14 XaXa is a hallmark of mouse naive pluripotency, the latter is characterized by unbiased  
15 embryonic lineage differentiation potential. Consequently, XX mouse naive PSCs have a double  
16 dose of X-linked genes and an increased X-to-autosome gene expression ratio compared with  
17 XY cells. Work over the past decade showed that female ESCs exhibit global DNA  
18 hypomethylation affecting most genomic features including imprint control regions [9–16,21].  
19 Recent work showed that female iPSCs also display global hypomethylation [22]. Differences in  
20 global DNA methylation have been attributed to X-chromosome dosage since female XO cells  
21 display male-like DNA methylation levels [9,11,13]. Female ESCs and iPSCs have genetically  
22 unstable X-chromosomes, deleting part or whole X-chromosomes [9,11,13–15,23,24]. Thus,  
23 mouse ESCs and iPSCs show DNA methylation and genetic loss of one X chromosome  
24 associated with XaXa.

25 It was also discovered by the Heard group that female XX ESCs show increased expression of  
26 several pluripotency-associated mRNAs, and display delayed pluripotency exit, indicating that  
27 features of naive pluripotency are promoted in female XX ESCs [11,25]. Differences in  
28 transcription have also been attributed to X-chromosome dosage since female XO ESCs, or  
29 *Xist*-induced X-chromosome inactivation, are associated with male-like pluripotency-associated  
30 gene expression and pluripotency exit [11]. Therefore, it is important to determine the potential  
31 influence of X-chromosome dosage on the molecular and functional properties of iPSCs and  
32 also for mechanistic studies of reprogramming. Despite its importance, a systematic comparison  
33 of transcriptional states and pluripotency exit in male and female mouse iPSCs has not yet been  
34 performed.

35 While several advances have been made, the molecular pathways by which XaXa modulate  
36 pluripotency remain incompletely understood [6]. At the mechanistic level, two active X-  
37 chromosomes inhibit MAPK and GSK3 signaling [8,11], and global DNA hypomethylation has  
38 been attributed to reduced expression of DNMT3A and DNMT3B [9], or DNMT3L [10], or  
39 UHRF1 [13,15,22] in female ESCs/iPSCs. More recently, it was discovered that increased  
40 dosage of the X-linked MAPK inhibitor *Dusp9* (dual-specificity phosphatase 9) is in part  
41 responsible for inhibiting DNMT3A/B/L and global DNA hypomethylation in female ESCs [13].

1 The expression level of *Dusp9* is higher in XX ESCs than in XY ESCs and overexpression of  
2 *Dusp9* in male ESCs induced female-like global DNA hypomethylation. Conversely,  
3 heterozygous deletion of *Dusp9* in female ESCs restored male-like global DNA methylation,  
4 suggesting that *Dusp9* is responsible for MAPK-mediated DNMT3A/B repression in female  
5 ESCs. However, whether *Dusp9* heterozygous deletion in female ESCs has effects on the  
6 transcriptional regulatory network and pluripotency exit has not yet been explored. Furthermore,  
7 how and which X-linked genes modulate the pluripotency regulatory network of naive PSCs  
8 remains unclear [6]. In addition, novel insights may be gained by identification of cis-regulatory  
9 elements that drive sex-specific pluripotent stem cell states.

10 Here, in order to investigate the influence of X-chromosome dosage on iPSCs, we  
11 systematically compared male and female mouse iPSCs at different passage and at the  
12 transcriptional, pluripotency exit, cell growth and X-chromosome dosage level. We found that  
13 sex-specific differences in cell growth, transcription and pluripotency exit are established late  
14 during iPSC reprogramming and subsequently resolved as a result of X-chromosome loss in  
15 female iPSCs upon passage. We further investigated the regulatory landscape of male and  
16 female ESCs using genome-wide chromatin accessibility analyses. We found that thousands of  
17 chromatin regions differ in accessibility in male and in female ESCs. Motif discovery analysis  
18 identified that more accessible chromatin in female ESCs is enriched for binding sites of key  
19 pluripotency regulators including KLF/ESRRB/OCT4/SOX2, suggesting stabilization of the naive  
20 pluripotency regulatory network via these regulators. By contrast, chromatin sites more  
21 accessible in male ESCs are most enriched for AP-1/TEAD motifs, downstream effectors of  
22 signaling pathways including MAPK and Hippo. We show that XY ESCs grow faster than XX  
23 ESCs, irrespective of culture conditions, mimicking growth differences between male and  
24 female mammalian post-implantation embryos. We further demonstrate that delayed exit from  
25 pluripotency and female-like transcription is maintained in the presence of male-like global DNA  
26 methylation in *Dusp9* heterozygous female ESCs. Altogether, we provide a previously  
27 unrecognized view of sex-specific epigenetic and transcriptional states and regulation in female  
28 naive PSCs, as well as chromatin accessibility landscapes and their associated transcriptional  
29 regulators, setting the stage for studying gene regulatory networks that are modulated by X-  
30 chromosome dosage in PSC.

## 31 RESULTS

### 32 Characterization of Cell Growth, Transcriptional States, and Pluripotency Exit in Male and 33 Female iPSCs

34 In order to explore the importance of sex on cell growth, transcriptional states and pluripotency  
35 exit of mouse iPSCs, we derived male and female iPSC lines from isogenic mouse embryonic  
36 fibroblasts (MEFs) carrying a tetO inducible transgene encoding the reprogramming factors  
37 *Oct4*, *Sox2*, *Klf4* and *c-Myc* in the *Col1A* locus and the reverse tetracycline transactivator  
38 (M2rtTA) in the *Rosa26* locus (Figure 1A) [26]. After two weeks of doxycycline (dox) treatment  
39 to induce reprogramming, 10 female and 11 male iPSC lines were expanded on feeders in the  
40 presence of serum and LIF (S/L) in the absence of dox (Figure 1A), or adapted to dual

1 ERK/GSK3 inhibition and LIF conditions (2i/L) (Figures S1A-E). This scheme allowed us to  
2 directly compare female and male iPSCs without the influence of differences in genetic  
3 background, reprogramming system or derivation method. Both female and male iPSCs could  
4 be propagated over multiple passages while maintaining their morphology, indicative of self-  
5 renewal, and expressed pluripotency-associated factors NANOG and DPPA4 (Figures 1B, S1A-  
6 B). Female iPSCs reactivated the inactive X-chromosome (Figures S1C/D), a marker of naive  
7 pluripotency [27]. Thus, we derived isogenic male and female iPSCs.

8  
9 We asked whether sex affects iPSCs growth. We counted the number of male and female  
10 iPSCs over two days starting from the same amount of cells. We found that all our early  
11 passage female iPSC lines grew slower than male iPSCs, with a doubling time (Td) extended by  
12 ~3.4 hours compared with male iPSCs grown in S/L (Td female=18.4±1.5hr vs Td  
13 male=15.0±0.9hr) (Figure 1C). Similarly, we found that female ESCs grew slower than male  
14 ESCs (Figure 1C). The sex-specific difference in iPSCs and ESCs growth did not depend on  
15 culture conditions because female ESCs and iPSCs still grew slower than male cells in 2i/LIF  
16 (Figure S1F). We conclude that early passage female mouse PSCs are characterized by lower  
17 growth compared with their male counterparts. These results are in agreement with the  
18 documented growth delay of female mammalian post-implantation embryos compared to male  
19 embryos [28].

20  
21 Using reverse transcription (RT) quantitative real-time PCR (qPCR) we found that in S/L, all our  
22 early passage female iPSC lines consistently expressed higher levels of pluripotency-  
23 associated genes *Prdm14*, *Nanog* and *Tcl1* compared with male iPSCs (Figure 1D). Western  
24 blot analysis showed that female iPSCs had increased NANOG protein levels compared with  
25 male iPSCs (Figure 1E). These differences closely resemble those of mouse ESCs [11,13], in  
26 agreement with the notion that iPSCs are molecularly equivalent to ESCs. Thus, reprogramming  
27 to iPSCs results in sex-specific differences in pluripotency-associated gene expression.

28  
29 Next, prompted by the differences in pluripotency gene expression, we investigated the extent  
30 to which sex affects exit from pluripotency in iPSCs. We subjected female and male iPSCs to  
31 LIF withdrawal-mediated differentiation and measured the downregulation of pluripotency-  
32 associated genes by RT-qPCR. Exit from pluripotency was delayed in female iPSCs for  
33 *Prdm14*, *Nanog* and *Tcl1* (Figure 1F). We confirmed these results using an alternative  
34 differentiation protocol that mimics epiblast differentiation (Figures S1E, S1G-I) [11,29]. Thus,  
35 female iPSCs exit pluripotency with delayed kinetics compared with male iPSCs, consistent with  
36 previous studies in ESCs [11,25]. Altogether, these findings show that our newly derived early  
37 passage iPSCs display sex-specific behavior in growth, pluripotency gene expression and in  
38 pluripotency exit kinetics, recapitulating sex-specific differences in mouse embryos and ESCs  
39 [11,28].

40  
41  
42  
43

## 1 Differences in Cell Growth, Transcription and Pluripotency Exit Correlate with the 2 Presence of Two Active X-chromosomes

3  
4 Female XX ESCs are prone to lose one of the two active X-chromosomes upon extended *in*  
5 *vitro* cell culture [9,10,13,23], and we recently showed that early passage female iPSCs are  
6 XaXa and become XO iPSCs upon passage (Pasque et al. unpublished). To test for X-  
7 chromosome loss in our iPSC lines, we designed a simple qPCR assay in which the  
8 X/autosome genomic DNA ratio is determined by measuring four X-linked genes (*Tfe3*, *Bcor*,  
9 *Pdha1* and *Mid1*, located on either distal region on the X-chromosome, Figure 1G, bottom) and  
10 one autosomal gene (*Gapdh*). We found that female iPSCs at late passage were consistently  
11 losing one of the two X-chromosomes, and termed these cells XO iPSCs (Figure 1G). These  
12 results were in agreement with an independent assay using RNA *in situ*-hybridization for X-  
13 linked gene *Tsix* (Figure S1C/D and [30]). Notably, the sex-specific differences in growth (Figure  
14 1H), in pluripotency-associated gene expression (Figures 1D/E) and pluripotency exit (Figure  
15 1F) all correlated with the presence of two active X-chromosomes. Collectively, these results  
16 indicate that sex-specific differences in growth rates, transcription and pluripotency exit are  
17 induced in iPSCs as a result of X-chromosome reactivation in female iPSCs, but are lost upon  
18 passage concomitant with X-chromosome loss in female iPSCs.

19  
20 What might be the functional relevance of sex-specific differences in cell growth? Female  
21 mouse and human embryos show a delay in post-implantation development that has been  
22 attributed to the presence of two X-chromosomes in female cells [28]. It has been suggested  
23 that the presence of two X-chromosomes slows down development to ensure that cells progress  
24 through X-chromosome inactivation [11]. We sought to test, *in vitro*, the hypothesis that reduced  
25 X-chromosome dosage provides a competitive growth advantage to cells that have undergone  
26 X-chromosome inactivation. We mixed XX ESCs and GFP-labelled XY ESCs in different ratios  
27 and followed the proportion of labeled cells over time. We found that the increased cell growth  
28 of male ESCs can provide a small advantage over a 8 day period (Figure S1K). We conclude  
29 that female mouse PSCs with two active X-chromosome recapitulate the growth delay of the  
30 early postimplantation female mammalian embryo.

## 31 *Eras*, *Dkc1*, *Otud6a*, *Fhl1*, *Zfp185* and *Scml2* Dosage Do Not Explain Sex-Specific 32 Differences in Pluripotency Exit

33 We sought to find the X-linked regulators that drive stabilization of pluripotency in female PSCs.  
34 We analyzed RNA sequencing (RNA-seq) and published proteomics data of male and female  
35 ESCs [13]. We selected X-linked candidate factors based on increased expression in female  
36 ESCs, and evidence that the genes are subject to X-chromosome inactivation (Tables S1/S2).  
37 We selected the candidate genes *Eras*, *Dkc1*, *Otud6a*, *Fhl1*, *Zfp185* and *Scml2* and  
38 overexpressed their cDNAs in male iPSCs (Figures S2A/B). To test the effect of overexpression  
39 on pluripotency exit, we induced differentiation by LIF withdrawal and measured pluripotency  
40 gene expression at 24h and 48h. We found that overexpression of *Eras*, *Dkc1*, *Otud6a*, *Fhl1*,  
41 *Zfp185* or *Scml2* was not sufficient to induce a delay in pluripotency exit (Figures S2C-J).  
42 Collectively, these findings do not support a significant role for these X-linked pluripotency  
43 genes in stabilizing pluripotency in female ESCs.

## 1 **The Open Chromatin Landscape of ESCs Exhibits Sex-Specific Differences**

2 To identify additional candidate regulators and to assess how X-chromosome dosage  
3 differentially primes mouse PSCs for rapid exit from pluripotency, we set out to globally define  
4 the chromatin accessibility landscape of male and female PSCs. We employed Assay for  
5 Transposase-Accessible Chromatin sequencing (ATAC-seq), a method that allows genome-  
6 wide mapping of open chromatin with high resolution [31]. We analyzed ATAC-seq datasets  
7 previously generated from male and female ESCs [32], allowing to define the open chromatin  
8 regions and the enrichment for transcription factor (TF) binding motifs associated with male and  
9 female open chromatin landscapes (Figure 2, Table S3). We first assessed differential  
10 accessibility between female and male ESCs, and found that most open chromatin regions were  
11 shared between male and female ESCs, indicating that the open chromatin landscapes of male  
12 and female ESCs are globally similar. However, we detected thousands of chromatin regions  
13 more accessible in female or in male ESCs (>2-fold, false discovery rate (FDR)<0.05), revealing  
14 that sex influences the open chromatin landscape of ESCs. We identified 5549 chromatin  
15 regions that are more open in female ESCs and 2921 chromatin regions that are more open in  
16 male ESCs, most of which were located on autosomes (Figure 2A, Table S3), which represents  
17 differences in global chromatin accessibility landscapes driven by sex. Most of the ATAC-seq  
18 peaks identified localized to distal genomic regions, suggesting enrichment in cis-regulatory  
19 sequences (Figure S3A). These results indicate that the chromatin landscape of female and  
20 male ESCs is globally similar, and also contains differentially accessible chromatin at thousands  
21 of specific genomic regions.

22  
23 For chromatin regions more open in XX ESCs (defined as “XXgain”), gene ontology (GO)  
24 analysis of associated genes identified 'stem cell maintenance' as the top term (Figure 2B), and  
25 associated with multiple pluripotency-related genes (*Prdm14*, *Nanog*, *Tcl1*, *Esrrb*, *Dppa4*,  
26 *Dppa5a*, and *Pou5f1*) (Figure 2C). We identified, in our RNA-seq data, 222 differentially  
27 expressed genes (DEGs) between male and female ESCs associated with XXgain chromatin  
28 regions, most of which (174/222, 78%) were upregulated in female ESCs (including  
29 pluripotency-associated genes *Prdm14* and *Nanog*) (Figures 2C/D, Table S4/S5), likely  
30 corresponding to the stabilization of pluripotency in female ESCs [11]. Confirming these  
31 findings, increased chromatin accessibility also associated with 129 proteins that are  
32 upregulated in female ESCs, including PRDM14, NANOG, TCL1 and DPPA5A (Figure S2B,  
33 Table S5) [13]. These results indicate that the open chromatin landscape of ESCs reflects  
34 specific cellular states, where female-specific open chromatin could dictate stabilization of  
35 pluripotency in female ESCs.

36  
37 In contrast to chromatin more open in female ESCs, GO analysis identified 'chordate embryonic  
38 development' as the top biological process term associated with chromatin that is more  
39 accessible in male ESCs (defined as “XYgain”) (Figure 2B). XYgain chromatin regions were  
40 associated with multiple genes involved in embryonic development, regionalization and  
41 morphogenesis (several *Hoxb* genes, *Pax3*, *Pax6*, *Fgf8*, *T*, *Krt8*, *Krt18*, *Meox1*, *Sox11*), several  
42 of which are not yet highly expressed in male ESCs but poised for latter activation during  
43 lineage specification (Figures 2E/F, Table S4) [33,34]. These results suggest that open  
44 chromatin associated with these lineage specification genes could poise chromatin for more

1 rapid transcriptional activation during differentiation of male ESCs compared with females  
2 ESCs. In further support of this, the primary ectodermal gene *Pax6* was upregulated more  
3 rapidly during differentiation of male ESCs (Figure S2D). Chromatin more accessible in male  
4 ESCs than in female ESCs also associated with 136 DEGs, 47% of which (64/136) were  
5 upregulated in male ESCs (*Krt8*, *Krt18*, *Sox11*) (Figures 2E/F, Table S4), and 53% of which  
6 were downregulated in male ESCs (Figure 2D, Table S4). In summary, these findings indicate  
7 chromatin more open in male or in female ESCs are associated with several lineage  
8 specification/differentiation related genes and multiple pluripotency genes, respectively. The  
9 chromatin accessibility landscape of male ESCs appears to prime these cells to initiate exit from  
10 pluripotency more rapidly than in female ESCs.

## 11 **Motif Analysis Reveals Regulators of Sex-Specific Cell States**

12 To gain insights in the regulatory networks that drive sex differences in ESCs, we searched for  
13 TF motifs enriched in the chromatin regions that are more open in female or in male ESCs. Motif  
14 enrichment analysis of the chromatin regions more open in female ESCs revealed a strong  
15 enrichment for the binding motif of TFs such as KLF5 (61.52%), KLF4 (27.49%), ESRRB  
16 (35.33%), SOX3 (58.44%), OCT4-SOX2-TCF-NANOG (13.18%), SOX2 (37.59%) and ZIC3  
17 (24%) (Figures 3A/B). KLF5, KLF4, KLF2, ESRRB and SOX2 have been functionally implicated  
18 in ESC self-renewal, reviewed in [35]. OCT4 is the paramount pluripotency factor [36,37] and its  
19 co-binding with SOX2 to Oct/Sox elements [38–40] stabilizes pluripotency [41]. ZIC3 is required  
20 to maintain pluripotency [42]. Interestingly, the pluripotency-associated factor *Zic3* is located on  
21 the X-chromosome (Figure 3A), raising the possibility that ZIC3 dosage could drive X-linked  
22 driven stabilization of pluripotency in female ESCs. In summary, all top TF motifs enriched in  
23 chromatin with increased accessibility in female ESCs belong to pluripotency-associated  
24 factors, suggesting that the identified pluripotency-associated TFs participate in stabilizing the  
25 pluripotency transcriptional regulatory network of female ESCs.

26  
27 By contrast, pluripotency-associated TF motifs were absent from the top motifs enriched in  
28 chromatin with increased accessibility in male ESCs (Figure 3C). Instead, within chromatin more  
29 open in male ESCs, motif enrichment analysis revealed binding sites of TFs such as JUN/AP-1  
30 (18.99%), TEAD (32.78%), FRA2 (26.18%) and BACH2 (12.38%) (Figures 3B/C). JUN/AP-1 is  
31 a transcriptional activator complex involved in regulating many processes [43,44] including cell  
32 growth and differentiation in response to a variety of stimuli including the MAPK pathway  
33 [45,46]. TEAD is a transcriptional cofactor family involved in cell growth and proliferation via the  
34 *Hippo* signaling pathway, and TEAD2 has been shown to be required for ESC self-renewal  
35 [47,48]. FRA2 is a member of the AP-1 complex [43]. BACH2 is a hematopoietic-, neuron-  
36 specific transcriptional repressor with the potential to regulate the lineage commitment [49–52].  
37 Additionally, male ESCs had significantly higher transcript level of *Bach2* than female ESCs  
38 (Table S1). As expected, open chromatin regions that are common between male and female  
39 ESCs still both showed enrichment of pluripotency-related TFs (not shown). We conclude that  
40 the differential enrichment of TF binding sites in sex-specific open chromatin regions provides a  
41 molecular link between transcriptional regulators, stabilization of pluripotency in female ESCs  
42 and rapid exit from pluripotency in male ESCs.

43

1 In order to identify the putative target genes, we searched for genes associated with open  
2 chromatin regions enriched for specific motifs, then determined the target genes shared for  
3 open chromatin containing more than one motif. We found that 574 genes were associated with  
4 binding motifs for all three motifs KLF, ESRRB and SOX2 (Figure 3D). These genes contained  
5 *Prdm14*. Thus, upregulation of *Prdm14* mRNA in female ESCs is associated with increased  
6 chromatin accessibility at genomic regions that contain multiple pluripotency-associated TF  
7 motifs. We sought to carry out a similar analysis for chromatin more open in male ESCs and  
8 identified 213 genes associated with both JUN/AP-1 and TEAD motifs. These genes included  
9 the early ectodermal gene *Krt18* and essential neurogenesis related gene *Sox11*, which were  
10 more expressed in male ESCs than in female ESCs. Taken together, these analyses allowed  
11 the identification of TFs that regulate a large number of cis-regulatory regions, thereby  
12 improving our understanding on how sex can drive two distinct pluripotent stem cell states.

### 13 ***Zic3* Dosage Does Not Modulate Sex-Specific Differences in Transcription and** 14 **Pluripotency Exit**

15 We sought to test if X-linked pluripotency-associated genes with enriched motifs identified in the  
16 open chromatin landscape of female ESCs stabilize pluripotency in female PSCs. Our motif  
17 discovery analysis identified the X-linked gene *Zic3* within the top motifs enriched in chromatin  
18 more open in XX ESCs (Figure 3A). Western blot analysis showed that female iPSCs and ESCs  
19 express higher ZIC3 protein than male iPSCs and ESCs (Figure 4A). Moreover, *Zic3* was  
20 reported to prevent endodermal lineage specification and to act as a transcriptional activator of  
21 *Nanog* expression [42,53], further suggesting that it could have a role in stabilization of naive  
22 pluripotency in female ESCs. To test the hypothesis that increased *Zic3* dosage stabilizes  
23 pluripotency in female ESCs, we generated *Zic3* heterozygous deletions to reduce *Zic3* dosage  
24 in female ESCs (Figures 4B/C, S4A/B). However, *Zic3*<sup>+/-</sup> female ESCs maintained female-like  
25 expression of *Prdm14*, *Nanog* and *Tcl1* and also displayed delayed exit from pluripotency  
26 (Figure 4D). Overexpression of *Zic3* in male iPSCs also maintained male-like pluripotency gene  
27 expression and differentiation kinetics (Figures S4C/D). Since reducing or increasing *Zic3*  
28 dosage in ESCs does not modulate pluripotency-associated gene expression or pluripotency  
29 exit, *Zic3* dosage does not explain the sex-specific differences in pluripotency-associated gene  
30 expression and pluripotency stabilization.

### 31 **Heterozygous *Dusp9* Deletion in Female ESCs Induces Male-like DNA Methylation and** 32 **Maintains Female-like Pluripotency Exit**

33 X-chromosome dosage has been shown to modulate the DNA methylation landscape of ESCs  
34 through the X-linked MAPK phosphatase *Dusp9* [13]. Reducing DUSP9 dosage in female ESCs  
35 rescues global DNA hypomethylation by inducing male-like global DNA methylation levels[13].  
36 However, whether *Dusp9* heterozygous deletion induces a male-like transcriptome, pluripotency  
37 exit and growth required additional experiments. We set out to investigate whether *Dusp9*  
38 heterozygous deletion and its associated DNA methylation level affect the sex-specific  
39 transcriptional state and pluripotency exit of female ESCs. We generated *Dusp9* heterozygous  
40 deletions in female XX ESCs using CRISPR-Cas9 genome editing, resulting in two independent  
41 *Dusp9*<sup>+/-</sup> XX ESC clones (Figures 5A/B, Figures S5A/B). *Dusp9*<sup>+/-</sup> ESCs maintained two active



1 X-chromosomes (Figures S5C/D) since we used polymorphic ESCs less susceptible to X-  
2 chromosome loss [13,54]. To determine if *Dusp9*<sup>+/-</sup> ESCs acquire male-like transcription, we  
3 analyzed the transcriptome of *Dusp9*<sup>+/-</sup> ESCs, *Dusp9*<sup>+/+</sup> ESCs and *Dusp9*<sup>+</sup> (XY) ESCs using  
4 RNA-seq. Principal component analysis (PCA) placed *Dusp9*<sup>+/-</sup> ESCs closer to *Dusp9*<sup>+/+</sup> ESCs  
5 but further away from XY ESCs (Figure 5C). We corroborated this finding using unsupervised  
6 clustering of the most variable genes between all 4 cell types, where *Dusp9*<sup>+/-</sup> ESCs clustered  
7 together with *Dusp9*<sup>+/+</sup> ESCs, and away from XY ESCs (Figure 5D). These results demonstrate  
8 that, surprisingly, reducing *Dusp9* dosage in female ESCs is not sufficient to induce a male-like  
9 transcriptome, unlike DNA methylation.

10 DEG analysis identified 948 DEGs between *Dusp9*<sup>+/-</sup> ESCs and control *Dusp9*<sup>+/+</sup> ESCs (DEGs  
11 between *Dusp9*<sup>+/-</sup> ESCs and *Dusp9*<sup>+/+</sup> ESCs shared between two independent *Dusp9*<sup>+/-</sup> ESC  
12 clones, Figures 5E, S5E, Table S6). GO analysis revealed the PI3K-Akt and MAPK pathways  
13 among the top pathways enriched in DEGs (Figure 5E). Unsupervised clustering analysis  
14 showed the activation of most MAPK target genes, in agreement with the function of *Dusp9* as a  
15 MAPK inhibitor (Figure 5F) [55]. Although the upregulation of MAPK target genes was expected,  
16 the striking difference of *Dusp9*<sup>+/-</sup> ESCs with XY ESCs was surprising because XY ESCs, like  
17 *Dusp9*<sup>+/-</sup> ESCs, also have a single active copy of *Dusp9*. These results suggest that there may  
18 be other X-linked genes participating in the regulation of MAPK signaling and that reducing  
19 *Dusp9* dosage in female ESCs also modulates Akt target genes.

20  
21 Surprisingly, in *Dusp9*<sup>+/-</sup> ESCs, we detected a clear upregulation of *Xist* and *Jpx* and a  
22 downregulation of *Tsix*, suggesting that *Dusp9* dosage may, at least partially, influence the X-  
23 chromosome inactivation center in female ESCs (Figure S5F). X-chromosome inactivation is  
24 controlled by the X-chromosome inactivation center containing key regulatory elements and  
25 long non-coding RNAs such as the X-chromosome inactivation initiator *Xist* and the *Xist*  
26 antagonist *Tsix* as well as other long noncoding RNAs such as *Jpx* (reviewed in [56]). The  
27 upregulation of *Xist* in *Dusp9*<sup>+/-</sup> ESCs did not lead to *Xist* cloud formation (Figure S5C).

28  
29 To study the effects of *Dusp9* heterozygous deletion in female ESCs on pluripotency exit, we  
30 subjected *Dusp9*<sup>+/-</sup> ESCs, *Dusp9*<sup>+/+</sup> ESCs and XY ESCs to LIF withdrawal differentiation for  
31 24h followed by RNA-seq analysis. Both PCA and unsupervised hierarchical clustering based  
32 on the top 500 or 200 most variable genes, grouped *Dusp9*<sup>+/-</sup> ESCs together with the parental  
33 *Dusp9*<sup>+/+</sup> ESCs, separately from XY ESCs (Figures 5C, 5G, S5G), therefore reducing *Dusp9*  
34 dosage is not sufficient to induce male-like pluripotency exit. In agreement with this finding,  
35 most delayed pluripotency-associated genes in *Dusp9*<sup>+/+</sup> ESCs still showed a delay in  
36 pluripotency exit in *Dusp9*<sup>+/-</sup> ESCs (29/42 genes, 70%), including genes such as *Prdm14* and  
37 *Nanog* which maintained a female-like pattern in *Dusp9*<sup>+/-</sup> ESCs during pluripotency exit  
38 (Figure 5H, Table S7). We validated the expression of *Prdm14* and *Nanog* using RT-qPCR  
39 analyses (Figure 5I). Hence, we conclude that reducing the dosage of *Dusp9* in female ESCs is  
40 not sufficient to induce a male-like transcriptome or accelerate pluripotency exit to a male-like  
41 state, despite changes in the expression level of multiple genes in MAPK and Akt signaling  
42 pathways. However, our *Dusp9*<sup>+/-</sup> ESCs did show male-like global DNA methylation (Figure  
43 S5H), corroborating recent findings [13]. In addition, we show that *Dusp9* overexpression in  
44 male ESCs was not sufficient to induce a female-like delay in differentiation (Figures S5I-L)

1 despite inducing female-like global DNA hypomethylation [13], consistent with a previous report  
2 [11]. Interestingly, we found that *Dusp9*<sup>+/-</sup> ESCs grew as slow as the parental *Dusp9*<sup>+/+</sup> ESCs,  
3 both slower than XY ESCs (Figure 5J), therefore reducing *Dusp9* dosage is not sufficient to  
4 induce male-like cell growth. This result suggests that there maybe other X-linked genes  
5 regulating sex-specific growth in PSCs. Altogether, these results indicate that reducing *Dusp9*  
6 dosage in female ESCs does not appear to be sufficient to induce male-like transcription and  
7 pluripotency exit, in contrast to the acquisition of male-like DNA methylation. Hence,  
8 heterozygous *Dusp9* deletion molecularly uncouples global DNA methylation from the  
9 pluripotency exit delay of female ESCs.

10

## 11 **DISCUSSION**

12

13 Induction of naive pluripotency during reprogramming to iPSCs and during *in vivo* development  
14 in inner cell mass (ICM) leads to X-chromosome reactivation in murine female cells [17–19,57].  
15 The consequences of X-chromosome dosage imbalance between female (XX) and male (XY)  
16 cells on mouse iPSCs remained unclear until now. In addition, the regulatory mechanisms at the  
17 basis of distinct sex-specific features in mouse PSCs were incompletely understood. In this  
18 study, we addressed these questions by analyzing the growth properties, transcriptional states  
19 and pluripotency exit of isogenic male and female iPSCs. We identified sex and X-chromosome  
20 dosage as important factors influencing the molecular and functional properties of iPSCs. By  
21 employing epigenomic analyses we found that sex modulates the open chromatin landscape of  
22 ESCs. Moreover, using genome editing we found that sex-specific differences in pluripotency  
23 exit and cell growth can be molecularly uncoupled from DNA methylation.

### 24 **Impact of Sex and X-chromosome Dosage on Growth, Transcription and Pluripotency** 25 **Exit**

26 One outcome of our study is that the number of active X-chromosomes correlates with sex-  
27 specific differences in growth, transcription and pluripotency exit in iPS cells (Figure 1), in  
28 addition to differences in DNA methylation [22]. Reprogramming somatic cells to iPSCs is an  
29 important system to study erasure of epigenetic memory and pluripotency. Sex does not appear  
30 to influence the efficiency of iPSCs generation, since we previously showed that male and  
31 female cells reprogram with similar efficiencies in this system [30]. However, we have now  
32 established that the presence of two active X-chromosomes as a result of reprogramming to  
33 pluripotency in female cells is associated with slower growth in iPSCs, increased pluripotency-  
34 associated gene expression, and delayed pluripotency exit. These differences are likely caused  
35 by changes in X-chromosome dosage, consistent with previous discoveries in mouse ESCs  
36 [6,9,11,14], in human ESCs [7,8,58] and in postimplantation mammalian embryos [6,28,59]. The  
37 notion that X-chromosome dosage influences the molecular and functional properties of iPSCs  
38 [6,11,22] is further supported by the loss of sex-specific differences concomitant with loss of one  
39 X-chromosome in female iPSCs, in agreement with previous observations in ESCs [9,11,13,14]  
40 and in iPSCs. The important point is that studies of reprogramming to iPSCs should consider

1 the number of active X-chromosomes as a modulator of the transcriptional and growth states of  
2 iPSCs and cells of different sex should always be studied separately, but also often both  
3 considered.

4 The presence of two X-chromosomes has been associated with delayed embryo post-  
5 implantation growth in several mammalian species [28,59]. Here we show for the first time that  
6 this property is recapitulated in mouse ESCs and iPSCs, where XX ESCs grow slightly, and  
7 significantly slower than XY and XO ESCs (Figure 1). Since the growth differences are  
8 maintained after dual GSK3B and ERK inhibition, additional pathways are likely involved. One  
9 hypothesis is that there could be a competitive growth advantage of cells that have undergone  
10 X-chromosome inactivation in the post-implantation mammalian embryo to select against  
11 remaining cells with two active X-chromosomes that fail to undergo X-chromosome inactivation.  
12 Our *in vitro* experiment suggests that X-chromosome inactivation could indeed provide a small  
13 growth advantage. However, this hypothesis remains to be tested *in vivo*.

#### 14 **Impact of *Dusp9* Dosage on Pluripotent States**

15 A previous study showed that *Dusp9* modulates DNA hypomethylation in female mouse ESCs  
16 [13]. However, the effects of reducing *Dusp9* dosage in XX ESCs on growth, transcription and  
17 pluripotency exit were unknown. An important outcome of our analyses is that female *Dusp9*  
18 heterozygous XX ESCs display male-like global DNA methylation levels and maintain female-  
19 like growth and delayed pluripotency exit (Figure 5). Thus, we propose that global DNA  
20 hypomethylation can be molecularly uncoupled from stabilization of pluripotency in XX ESCs.  
21 This result was unexpected because reducing the expression of DNMTs in male ESCs is  
22 associated, at least in part, with delayed pluripotency exit [11]. However, it was reported that the  
23 ICM of male and female embryos show comparable DNA methylation [13], despite delayed  
24 female development, suggesting that DNA hypomethylation and stabilization of pluripotency can  
25 be uncoupled both *in vivo* and *in vitro*. Our results therefore suggest that sex-specific DNA  
26 methylation levels and stabilization of pluripotency in PSCs are regulated, at least in part, by  
27 distinct X-linked genes (*Dusp9* for DNA methylation levels, other gene(s) for delayed  
28 pluripotency exit and growth). Our results do not support a major role of several X-linked genes,  
29 including *Zic3*, *Dkc1*, *Otud6a*, *Fhl1*, *Zfp185*, *Scml2* and *Eras* in stabilizing pluripotency.  
30 Therefore, identifying the X-linked gene(s) responsible for delayed pluripotency exit and slower  
31 growth of female mouse PSCs warrant future studies [6]. An interesting candidate is the  
32 recently-identified X-linked transient octamer binding factor 1 (TOBF1) [60], since it was shown  
33 to sustain pluripotency. It is also possible that other regulators of the Erk pathway are involved.  
34 A previous study in human ESCs reported that human primed PSCs with eroded X-  
35 chromosome inactivation and increased expression of the MAPK/ERK downstream effector  
36 ELK-1 have decreased expression of TRA-1-60, a marker of the differentiated state [8].  
37 However, human primed PSCs studies are likely not compatible with mouse naive PSCs studies  
38 because they reside in distinct pluripotent states. In addition, there has been conflicting reports  
39 on the effects of *Dusp9* overexpression on ERK phosphorylation in mouse ESCs, despite the  
40 expected transcriptional inhibition of ERK targets genes [6]. One study found that *Dusp9*  
41 promotes phosphorylated ERK (pERK) [13], while another found reduced pERK after *Dusp9*

1 overexpression [55]. Our results are more in agreement with the latter study [13] since,  
2 unexpectedly, *Dusp9* heterozygous deletion appeared to decreased pERK levels, concomitant  
3 with a high increase in expression of many ERK target gene. Identifying additional X-linked  
4 regulators of sex-specific differences, including ERK regulators, deserves future investigations.

## 5 **Differences in the Chromatin Landscape Underlie Sex-Specific Pluripotency States**

6 To better understand what drives sex-specific features of the pluripotent regulatory network in  
7 ESCs, we explored the open chromatin landscapes of male and female ESCs. While both male  
8 and female ESCs possessed similar open chromatin landscapes, thousands of chromatin  
9 regions were differentially accessible in male and female ESCs (Figure 2). These differentially  
10 accessible regions could underlie the distinct transcriptional regulatory networks of male and  
11 female ESCs. Decoding differentially accessible chromatin regions, we identified several  
12 pluripotency genes such as *Prdm14*, *Tcl1* and *Nanog* with increased accessibility in female  
13 ESCs. These genes have been associated with naive pluripotency hence they could act as  
14 targets to stabilize naive pluripotency in female ESCs [11]. We went further by identifying a  
15 catalogue of cis-regulatory regions including promoters that are modulated by sex in ESCs.  
16 These observations indicate that X-chromosome dosage modulates the chromatin accessibility  
17 landscapes of ESCs.

18 Unexpectedly, chromatin regions more open in female ESCs associated with several terms  
19 related to trophoctoderm and placenta development (Figure 2B). Male mouse ESCs do not  
20 readily differentiate into trophoctoderm [61]. However, male *Dnmt1* knockout ESCs, which show  
21 reduced global DNA methylation like female ESCs [9–11,62], have been shown to reacquire  
22 trophoctoderm differentiation potential in addition to embryonic lineage differentiation capacity  
23 [9–11,62]. Collectively, these observations raise the possibility that female ESCs may reacquire  
24 trophoctoderm differentiation potential due to global DNA hypomethylation. Therefore, female  
25 ESCs may not only be stabilized in naive pluripotency, but they may also unlock an extra-  
26 embryonic differentiation program as a result of global DNA hypomethylation, highlighted here  
27 by the acquisition of chromatin accessibility related to trophoctoderm differentiation.  
28 Nevertheless, global DNA hypomethylation in female ESCs also leads to imprint erasure, which  
29 was suggested to compromise development [14,15,63]. Our results suggest that female ESCs  
30 grown in S/L may acquire extended pluripotent stem cell properties characterized by both  
31 trophoctoderm and embryonic lineage differentiation capacity, in addition to loss of imprints.  
32 This hypothesis can be tested by subjecting female ESCs to trophoctoderm differentiation  
33 assays.

## 34 **Transcriptional Regulators of Sex-Specific Pluripotent Stem Cell States**

35 Decoding differentially accessible chromatin allowed us to distinguish distinct sets of enriched  
36 TF binding motifs in male and female ESCs. Specifically, we identified motifs for KLF5, ESRRB,  
37 SOX3, OCT4-SOX2-TCL-NANOG, SOX2 and ZIC3 enriched in chromatin more open in female  
38 ESCs, all of which have been implicated in pluripotency [35–37,41,42]. These results suggest  
39 that the stabilization of pluripotency in female ESCs is mediated by these core master  
40 regulators. However, *Zic3* heterozygous deletion had no effect on stabilization of pluripotency.

1 Although no TF ChIP-seq data is available for female ESCs to date, our in silico analyses  
2 identified a high confidence set of direct putative KLF5, ESRRB, SOX2 and OCT4 targets in  
3 female ESCs, including known pluripotency genes. Moreover, the specific enhancer associated  
4 with *Prdm14* which becomes more accessible in female ESCs overlaps with ChIP-seq binding  
5 sites of OCT4, SOX2 and NANOG in male ESCs (not shown), further suggesting that the  
6 binding of master pluripotency regulators takes place at these more accessible regions in  
7 female ESCs. Our results raise the possibility that pluripotency is stabilized in female ESCs by  
8 binding of core pluripotency factors to a subset of sex-specific regulatory elements that include  
9 *Prdm14*, *Tcl1* and *Nanog*. Dual promotion of *Prdm14* and *Nanog* expression represents a  
10 possible naive pluripotency stabilization mechanism consistent with their established functions  
11 in ESCs [64,65].

12 In contrast to the female state, differentially accessible chromatin more open in male ESCs  
13 identified AP-1 and TEAD as candidate regulators, which have not been implicated in sex-  
14 specific regulation of pluripotency before. JUN/AP-1 control many cellular processes including  
15 proliferation, apoptosis and differentiation in response to a variety of stimuli including the MAPK  
16 pathway (reviewed in [43]). TEAD is a TF family involved in cell growth and differentiation via  
17 the Hippo signaling pathway (reviewed in [66] and [47]). The role of AP-1/TEAD TFs in the  
18 context of sex-specific transcription in ESCs warrants future studies.

19 To conclude, this is the first report which reveals that DNA hypomethylation and delayed  
20 pluripotency exit can be uncoupled in female mouse ESCs. Furthermore, our study shows for  
21 the first time that sex-specific differences in cell growth, transcription, and pluripotency exit in  
22 iPSCs correlate with the number of active X-chromosomes. Using information from the genome,  
23 the epigenome and the transcriptome we gained insights into modulation of the open chromatin  
24 landscape and the transcriptional regulatory network of ESCs by sex. Furthermore, better  
25 understanding how sex modulates pluripotency of iPSCs will have important implications for  
26 disease modeling and regenerative medicine. Our results raise the possibility that the  
27 pluripotent state can be harnessed for sex-specific regenerative medicine.

## 28 **EXPERIMENTAL PROCEDURES**

### 29 **Mice and reprogramming**

30 MEFs were isolated from individual E14.5 mouse embryos obtained from a cross between wild  
31 type (WT) C57BL/6 and homozygous *Rosa26:M2rtTA*, TetO-OSKM mice [26]. Individual  
32 embryos were genotyped for sex using *Ube1* as previously described (See Table S8 for primer  
33 sequence) [30] using homemade Taq DNA Polymerase and grown in MEF medium [DMEM  
34 (Gibco, 41966-052) supplemented with 10% (v/v) fetal bovine serum (FBS, Gibco, 10270-106),  
35 1% (v/v) penicillin/streptomycin (P/S, Gibco, 15140-122), 1% (v/v) GlutaMAX (Gibco, 35050-  
36 061), 1% (v/v) non-essential amino acids (NEAA, Gibco, 11140-050), and 0.8% (v/v) beta-  
37 mercaptoethanol (Sigma, M7522)]. Reprogramming was induced by doxycycline (final 2 µg/ml)  
38 in mouse ESC medium [KnockOut DMEM (Gibco, 10829-018) supplemented with 15% FBS, 1%  
39 (v/v) P/S, 1% (v/v) GlutaMAX, 1% (v/v) NEAA, 0.8% (v/v) beta-mercaptoethanol, and mouse

1 LIF] in the presence of ascorbic acid (final 50 µg/ml). Individual colonies were picked at day 16  
2 onto irradiated male feeders in ESC medium without doxycycline or ascorbic acid and expanded  
3 for three passages, eventually obtaining 10 female iPSC lines (lines 1, 4, 5, 6, 8, 12, 13, 14, 16,  
4 17, 18) and 11 male iPSC lines (lines 19, 20, 21, 22, 23, 24, 25, 26, 27, 28, 29) at passage (P) 4  
5 (Figure S1B). iPSC lines 1, 4, 8, 12, 14, 16, 20, 21, 22, 24, 26 and 28 were also used in another  
6 study (Pasque et al. unpublished). All animal work carried out in this study is covered by a  
7 project license approved by the KU Leuven Animal Ethics Committee.

## 8 **Cell lines and culture**

9 XY ESCs (V6.5) and XX ESCs (F1-2-1) were obtained from the Plath laboratory. Independently-  
10 derived XY ESCs and XX Mus/Cas ESCs were also used here and obtained from the Deng  
11 laboratory [25]. GFP-labelled (Oct4-GiP) XY ESCs were previously described [67]. ESCs and  
12 iPSCs (male iPSC line 4, 8, 16; female iPSC line 20, 21, 22) were expanded on top of male WT  
13 feeders in mouse ESC medium (S/L condition), eventually early passage cells (iPSCs: P6-P8)  
14 and late passage cells (iPSCs: P13-P14) were used for further experiments. ESCs and iPSCs  
15 (male iPSC lines 1, 4, 8, 12, 16; female iPSC lines 19, 20, 21, 22, 23, 26) were adapted to  
16 2i/LIF, where cells grown on feeders in S/L condition (iPSCs: P4) were switched to new tissue  
17 culture dishes precoated with gelatin (from porcine skin, 0.1% g/v final, Sigma, G2500) without  
18 feeders in 2i/LIF medium [N2B27 basal medium (Neurobasal medium (50% v/v final, Gibco,  
19 21103-049) and DMEM/F-12 medium (50% final, Gibco, 11320-074) supplemented with L-  
20 Glutamine (1.25 mM final, Gibco, 25030081), NDiff Neuro2 supplement (1x final, Millipore,  
21 SCM012), B27 supplement (1x final, Gibco, 17504-044), 0.8% (v/v) beta mercapto ethanol, and  
22 1% (v/v) P/S) supplemented with 0.35% (g/v) Bovine Serum Albumin (BSA, Sigma, A7979),  
23 homemade mouse LIF, GSK3 inhibitor CHIR-99021 (3 µM final, Axon Medchem, Axon 1386)  
24 and MEK inhibitor PD0325901 (1 µM final, Axon Medchem, Axon 1408)] for four passages.

## 25 **Plasmids Constructs**

26 The full-length mouse cDNAs of *Dusp9*, *Zic3*, *Eras*, *Dkc1*, *Otud6a*, *Fhl1*, *Zfp185*, and *Luciferase*  
27 (from pGL2-Basic Promage, E1641), *NLS-cherry* was cloned into pENTR vectors (Invitrogen,  
28 K240020) with either a C-terminal or a N-terminal HA tag, or no tag, and recombined into pPB-  
29 CAG-Dest-pA-pgk-bsd (PB-DEST-BSD) destination vectors. The PB-Scml2-BSD plasmid was  
30 obtained by recombining the pDONR221-Scml2 plasmid [68] into PB-DEST-BSD. Guide RNAs  
31 (gRNAs) were cloned into SapI digested pZB-sg3 [69]. All gRNAs sequences are included in  
32 Table S8, Figures S4A, S5A. All constructs were verified by DNA Sanger sequencing.

## 33 **Generation of stable male iPSCs overexpressing X-linked candidate genes**

34 Male iPSCs (line 4, P5, grown on feeders in S/L conditions) were feeder-depleted before  
35 seeding in six-well plates precoated with 0.1% gelatin in S/L medium at a density of 650,000  
36 cells per well, which were co-transfected with 1 µg of PB expression constructs encoding  
37 candidate genes and 3 µg of pCAGP Base [70] using 10 µl Lipofectamine 2000 (Invitrogen,  
38 11668027). Transfected cells were selected with 20 µg/mL blasticidin (Fisher BioReagents,  
39 BP2647100) supplemented to the medium for two days starting from 24h after transfection and  
40 maintained with 5 µg/mL blasticidin thereafter.

## 1 **Generation of female XX ESC lines with *Dusp9* or *Zic3* heterozygous deletions**

2 2000,000 female F1-2-1 ESCs (P19, grown on feeders in S/L condition) were resuspended in 1  
3 ml of S/L medium and co-transfected with 2 ug of a plasmid expressing Cas9 under a CAG  
4 promoter and 1 ug of 2 plasmids (pZB-sg3 [69]) containing gRNAs (Table S8) using 10  $\mu$ l  
5 Lipofectamine 2000 (Invitrogen, 11668027) (Figures S4A, S5A) for one hour before plating on 4-  
6 drug resistant (DR4) feeders. Transfected cells were selected with 2  $\mu$ g/mL puromycin (Fisher  
7 BioReagents, BP2647100) on DR4 feeders in ESC medium for two days starting from 24h after  
8 transfection, and expanded at low density on WT feeders in 10cm dishes. Individual colonies  
9 were picked onto WT feeders, expanded for another two passages and genotyped for both WT  
10 and mutant alleles (primers in Table S8). WT and mutant alleles were further verified by DNA  
11 Sanger sequencing.

## 12 **Differentiation**

13 To induce differentiation towards epiblast-like cells (EpiLCs), ESCs and iPSCs (male lines: 1, 4,  
14 8, 12, 16; female lines: 19, 20, 21, 22, 23, 26), which had been adapted to 2i/LIF conditions,  
15 were plated in N2B27 basal medium supplemented with 10 ng/ml Fibroblast Growth Factor-  
16 basic (Fgf2, Peprotech, 100-18C) and 20 ng/ml Activin A (ActA, Peprotech, 120-14E) on  
17 Fibronectin (5  $\mu$ g/10  $\text{cm}^2$ , Millipore, FC010-5MG)-coated tissue culture plates at a cell density of  
18  $8 \times 10^4$  cells/ $\text{cm}^2$  for four days, during which medium was refreshed daily and cells were  
19 harvested at different time points (0h, 12h, 1 day, 2 days, 3 days and 4 days), as previously  
20 described [11]. ESCs (WT female and male ESCs, *Dusp9*<sup>+/-</sup> ESCs, and *Zic3*<sup>+/-</sup> ESCs) and  
21 iPSCs (male iPSC lines 4, 8, 16; female iPSC lines 20, 21, 22; both early and late passages)  
22 grown in S/L condition were differentiated in the absence of feeders by LIF withdrawal (similar  
23 as mouse ESC medium but with 10% FBS and without LIF) at a cell density of  $4 \times 10^4$  cells/ $\text{cm}^2$   
24 for two days, during which medium was refreshed daily and cells were harvested at different  
25 time points (0h, 24h and 48h), as previously described [11]. Likewise, male iPSC lines  
26 overexpressing X-linked genes were differentiated by LIF withdrawal with 5  $\mu$ g/mL blasticidin in  
27 the absence of feeders.

## 28 **Cell growth assay**

29 ESCs and iPSCs were plated in 24-well plates at a cell density of  $4 \times 10^4$  cells/ $\text{cm}^2$  for two days,  
30 during which medium was refreshed daily and cells were counted at different time points (0h,  
31 12h, 24h, 36h and 48h). The cell numbers are presented as fold changes relative to cell  
32 numbers at 0h.

## 33 **Immunofluorescence**

34 Immunofluorescence analyses were carried out largely as described previously [30], using the  
35 following primary antibodies: NANOG (eBioscience, 14-5761 clone eBioMLC-51, 1/200; and  
36 Abcam, ab80892, 1/ 200), DPPA4 (R&D, AF3730, 1/200), HA (Cell Signaling Technology,  
37 2367S, 1/100), DUSP9 (Abcam, ab167080, 1/100). Images were acquired using an ApoTome  
38 Zeiss Microscope equipped with an AxioCam MRc5 camera. ESC and iPSC lines were defined  
39 as NANOG<sup>+</sup> or DPPA4<sup>+</sup> when >50% cells showed NANOG or DPPA4 staining signal.

## 1 RNA FISH

2 RNA Fluorescence In Situ Hybridization (RNA FISH) analyses were carried out mostly as  
3 described previously using double stranded directly labelled DNA probe for *Tsix/Xist* [30].  
4 Images were acquired using an ApoTome Zeiss Microscope equipped with an AxioCam MRC5  
5 camera. Single-cell resolution analysis of *Tsix* biallelic expression in iPSCs and ESCs was  
6 determined by calculating the ratio of cells with biallelic *Tsix* expression to the cells with  
7 monoallelic or biallelic *Tsix* expression.

## 8 Genomic DNA extraction and qPCR

9 Genomic DNA (gDNA) was extracted from feeder-depleted ESCs and iPSCs using the PureLink  
10 Genomic DNA Kit (Invitrogen, K1820) and qPCR was performed using the Platinum SYBR  
11 Green qPCR SuperMix-UDG kit (Invitrogen, 11733046) on a ABI ViiA7 real-time PCR system  
12 (Applied Biosystems), following the manufacturer's protocol. Primers against four X-linked  
13 genes (*Tfe3*, *Bcor*, *Pdha1*, and *Mid1*) covering the two distal parts of the mouse X-chromosome  
14 are listed in Table S8 (Figure 1G). The standard curve was derived from serial dilutions of gDNA  
15 from XY ESCs (V6.5). All qPCR assays used had an efficiency above 95%. Relative quantities  
16 of each gene were measured as arbitrary units from comparison to the standard curve. The ratio  
17 of X-chromosome to autosome (X/Autosome Ratio) in DNA level was presented as the average  
18 ratio of the X-linked gene quantity (*Tfe3*, *Bcor*, *Pdha1* and *Mid1*) to the autosomal gene quantity  
19 (*Gapdh*), in other words  $X/Autosome\ Ratio = (Tfe3/Gapdh + Bcor/Gapdh + Pdha1/Gapdh +$   
20  $Mid1/Gapdh)/4$ .

## 21 RT-qPCR

22 Total RNA was extracted using the RNeasy Mini Kit (Qiagen, 74106) or TRIzol (Invitrogen,  
23 15596026). cDNA synthesis was performed using the SuperScript III First-Strand Synthesis  
24 SuperMix kit (Invitrogen, 11752-050) and RT-qPCR was performed using the Platinum SYBR  
25 Green qPCR SuperMix-UDG kit (Invitrogen, 11733046) and on the ABI ViiA7 real-time PCR  
26 system, following the manufacturer's protocol. Primers used are listed in Table S8. The  
27 standard curve was derived from serial dilutions of cDNA. All assays used had an efficiency  
28 above 95%. Relative quantities of each transcript were calculated as arbitrary units from  
29 comparison to the standard curve. Relative expression level of the target transcript was  
30 presented as the ratio of the target transcript quantity to the housekeeping transcript (*Gapdh*)  
31 quantity. Logarithm values (base 2) of relative expression levels were used for assessment of  
32 the gene expression kinetics during differentiation. The relative gene expression levels of five  
33 pluripotency-associated genes (*Prdm14*, *Nanog*, *Tcl1*, *Rex1* and *Esrrb*) from iPSCs (male lines:  
34 1, 4, 8, 12, 16; female lines: 19, 20, 21, 22, 23, 26) and ESCs (V6.5 male ESCs and F1-2-1  
35 female ESCs) at 0h and 24h of EpiLC differentiation were used for unsupervised clustering  
36 comparison, which was performed in R with heatmap.2 function in package "gplots".

## 37 RNA sequencing

38 Total RNA was isolated from two independent female *Dusp9*<sup>+/-</sup> ESC lines, *Dusp9*<sup>+/+</sup> XX and  
39 XY ESCs in both the undifferentiated state and the differentiated state after 24 hours of LIF



1 withdrawal using TRIzol following the manufacturer's protocol. 4 µg of total RNA was used for  
2 construction of stranded poly(A) mRNA-Seq library with the KAPA stranded mRNA Library prep  
3 kit (KAPA Biosystems, KK8421). Library concentrations were quantified with the Qubit dsDNA  
4 HS (High Sensitivity) Assay Kit (Invitrogen, Q32854), and equimolar amounts were pooled for  
5 single-end sequencing on an Illumina HiSeq 4000 instrument (Illumina) to yield ~20 million  
6 (range 16-23 million) 36bp long reads per sample.

## 7 **Differential gene expression analysis**

8 Reads from all datasets (*Dusp9*<sup>-/-</sup> ESCs, *Dusp9*<sup>+/+</sup> ESCs and XY ESCs) were aligned to  
9 mouse reference genome GRCm38/mm10 using STAR (v2.5.3a) with default parameters  
10 followed with conversion to BAM format sorted by coordinate. The mapping efficiencies of the  
11 datasets were >69% of uniquely mapped reads. Subsequently, the featureCounts function from  
12 the R Bioconductor package "Rsubread" was used to assign mapped reads to genomic  
13 features. For downstream analyses, only the genes with CPM value (count-per-million) higher  
14 than 0.5 in at least two libraries were retained. The resulting read count matrix (Table S5) was  
15 used as the input for PCA with the top 500 most variable genes. Differential gene expression  
16 analysis was performed using the edgeR quasi-likelihood pipeline in R [71]. Obtained p-values  
17 were corrected for multiple testing with the Benjamini-Hochberg method to control the FDR.  
18 DEGs were defined on the basis of both FDR < 0.05 and fold difference ≥ 1.5. Venn diagrams  
19 were generated using an online tool as previously described [72]. Heatmaps were created using  
20 unsupervised hierarchical clustering of both 200 most variable genes and the different samples  
21 and generated in R using the heatmap.2 function of the package "gplots".

## 22 **Definition of pluripotency exit delay**

23 In order to quantitatively measure the pluripotency exit delay in *Dusp9*<sup>+/+</sup> ESCs, XY ESCs and  
24 *Dusp9*<sup>-/-</sup> ESCs, an expression matrix containing genes related to stem cell maintenance  
25 (GO0019827) and stem cell development (GO0048864) with normalized counts was created.  
26 The ratio of expression level at 24h to 0h of differentiation (24h/0h ratio) was calculated for both  
27 WT XY and *Dusp9*<sup>+/+</sup> ESCs. Only the genes that were downregulated in XY ESCs and had  
28 24h/0h ratios < 0.75 passed the filtering. Subsequently, 24h/0h ratios were compared between  
29 WT XX and XY ESCs, if the resulting value was >1, the gene was qualified as a "delayed" gene  
30 during the pluripotency exit in *Dusp9*<sup>+/+</sup> ESCs. For these genes, the same algorithm was  
31 applied to evaluate the delay in *Dusp9*<sup>-/-</sup> ESCs.

## 32 **Differential chromatin accessibility analysis**

33 ATAC-seq data for mouse XX ESCs and XY ESCs were retrieved from a previous collection  
34 (accession numbers are GSM2247118 and GSM2247119 in XX and XY ESCs, respectively)  
35 [32]. Single-end-reads raw data were analyzed using the ATAC-seq pipeline from the Kundaje  
36 lab (Version 0.3.3)[73]. Briefly, the raw reads were first trimmed using cutadapt (version 1.9.1)  
37 to remove adaptor sequence at the 3' end. The trimmed reads were aligned to reference  
38 genome (mm10) using Bowtie2 (v2.2.6) using the '--local' parameter. Single-end reads that  
39 aligned to the genome with mapping quality ≥30 were kept as usable reads (reads aligned to the

1 mitochondrial genome were removed) using SAMtools (v1.2). PCR duplicates were removed  
2 using Picard's MarkDuplicates (Picard v1.126). Open chromatin regions (peak regions) were  
3 called using MACS2 (v2.1.0) using the '-g 1.87e9 -p 0.01 --nomodel --shift -75 --extsize 150 -B -  
4 -SPMR --keep-dup all --call-summits' parameter [74]. The differential chromatin accessibility  
5 analysis and related plots were performed using the DiffBind package using the 'summits=250,  
6 default DESeq2, log2fold=1, FDR<=0.05' parameter [75]. GO analysis for Biological Process  
7 terms was performed using GREAT (v3.0.0) analysis [76] with the mm10 reference genome,  
8 where each region was assigned to the single nearest gene within 1000kb maximum distance to  
9 the gene's TSS.

## 10 **Motif Discovery Analysis**

11 Known motif search was performed using program of findMotifsGenome.pl in the HOMER  
12 package (v4.9.1) with 'mm10 -size -250,250 -S 15 -len 6,8,10,12,16' parameters [77].  
13 Incidences of specific motif was examined by the program of annotate-Peaks.pl in the HOMER  
14 package with size parameter "-size 500".

## 15 **Western blots**

16 Cells were detached from plates with 0.25% Trypsin-EDTA (Gibco, 25200056), pelleted before  
17 addition of RIPA lysis buffer (Sigma, R0278-50ML) supplemented with 1% (v/v) Protease  
18 inhibitor cocktail (Sigma, P8340-1ml) and 1% (v/v) Phosphatase inhibitor Cocktail 3 (Sigma,  
19 P0044-1ML), and lysed on ice for 30 min. The lysates were spun for 10 min at 13000 rpm. The  
20 protein concentration was determined with BCA protein assay kit (Pierce, 23225). Each sample  
21 with 15 µg of total protein was denatured in 1x LDS Sample buffer (Life Technologies, NP0007)  
22 with 100 mM DTT for 5 min at 98°C. The cell lysates were loaded onto a 4%–15% mini-Protean  
23 TGX gel (Bio-Rad #456-1083), electrophoresed, and transferred to nitrocellulose membranes  
24 (VWR,10600002). Membranes were blocked in PBS 0.1% (v/v) Tween-20 and 5% (g/v) blotting  
25 reagent (Bio-Rad, 1706404) and incubated with the following primary antibodies overnight at  
26 4°C: rabbit anti-NANOG (Abcam, ab80892, 1/1000), rabbit anti-DUSP9 (Abcam, ab167080,  
27 1/500), mouse anti-DKC1 (Santa Cruz, sc-365731, 1/250), mouse anti-HA (Cell Signaling  
28 Technology (CST), #2367S, 1/1000), rabbit anti-Phospho-ERK1/2 (Thr202/Tyr204) (CST,  
29 #4370, 1/2000), mouse anti-ERK1/2 (CST, #4696, 1/2000), and mouse anti-ACTIN (Abcam,  
30 ab3280, 1/5000). After extensive PBS 0.1% Tween-20 (PBS-T) washes, membranes were  
31 incubated with a secondary HRP-conjugated goat anti-mouse IgG antibody (Bio-Rad, 1706516,  
32 1/5000 ) or goat anti-rabbit IgG antibody (Bio-Rad, 1706515 1/5000) for 30 minutes at room  
33 temperature. After another round of extensive PBS-T washes, protein expression was visualized  
34 using the ECL chemiluminescence reagent (Perkin-Elmer, NEL103001EA) and LAS-3000  
35 imaging system (Fuji). Data were analyzed with ImageJ.

## 36 **Statistical analysis**

37 Statistical tests were performed using the Graphpad Prism 5 software (GraphPad Software).  
38 Unpaired two-tailed t-test, one-way ANOVA with Dunnett's multiple comparisons test or two-way  
39 repeated-measures ANOVA were used as indicated. All data are presented as the mean±SEM.  
40 p-values <0.05 were considered statistically significant.

## 1 **Data Availability**

2 The ATAC-seq data discussed in this publication have been deposited in NCBI's Gene  
3 Expression Omnibus (Edgar et al., 2002) and are accessible through GEO Series accession  
4 number GSM2247118 and GSM2247119. The GEO accession number for the RNA-seq data  
5 reported in this paper is GSE110215.

## 6 **ACKNOWLEDGEMENTS**

7 We apologize to the authors that we could not cite due to space constraint. We thank to Edda  
8 Schulz, Frederic Lluís Vinas and Stein Aerts for discussions; Rudolf Jaenisch for providing mice;  
9 Qiaolin Deng for the Mus/Cas ESCs, Ye-Guang Chen for the *Dusp9* plasmids, Miguel Branco  
10 for the Scml2 plasmids, José Silva for the PiggyBac plasmid, Mitchell Guttman and Jesse  
11 Engreitz for the pZB-sg3 plasmid, Sein Aerts, Liesbeth Minnoye, Kristofer Davie and Xinlong  
12 Luo for help with bioinformatics and ATAC-seq; Kenjiro Shirane and Hiroyuki Sasaki for  
13 providing processed data. We thank Edda Schulz, Kathrin Plath, Constantinos Chronis and Kian  
14 Koh for critically reading the manuscript. We are grateful to the help of KU Leuven FACS Core,  
15 Genomics Core and Mouse facility, Metabolomics Core, VIB/KU Leuven and SCIL. This work  
16 was supported by The Research Foundation – Flanders (FWO) (Odysseus Return Grant  
17 G0F7716N to V.P.), the KU Leuven Research Fund (BOFZAP starting grant StG/15/021BF to  
18 V.P., C1 grant C14/16/077 to V.P. and Project financing), and FWO Ph.D. fellowships to A.J.  
19 (1158318N).

## 20 **AUTHOR CONTRIBUTIONS**

21 Conception and design, J.S. and V.P.; Experiments, J.S., N.D.G., L.V., T.O., I.T. and V.P.;  
22 Analyses, J.S.; RNA-seq analyses, A.J. and J.S.; Writing V.P. and J.S. with input from all  
23 authors; Supervision, V.P.

## 24 **FIGURE LEGENDS**

25 **Figure 1. Sex-specific differences in transcriptional, pluripotency exit and cell growth in**  
26 **mouse iPSCs.**

27 **(A)** Scheme of female and male iPSCs derivation, characterization and differentiation.

28 **(B)** Representative images of female and male iPSCs and ESCs grown on feeders in S/L  
29 condition.

30 **(C)** Growth curves and doubling times of female and male iPSCs (i) and ESCs (ii) in S/L  
31 condition. Cell were counted at the indicated time points and presented as fold changes relative  
32 to averages ( $\pm$ SEM) of male and female iPSC lines at 0h (three lines each,  $n=1$ , left panel) in  
33 early passage (P6) and of male and female ESCs (one line each,  $n=3$ , right panel), respectively.  
34 Growth curve: \* $p<0.05$ , \*\*\* $p<0.001$ , Male iPSCs vs Female iPSCs, Male ESCs vs Female  
35 ESCs, two-way repeated-measures ANOVA with Bonferroni posttests. Doubling time (Td):  
36 \* $p<0.05$ , \*\* $p<0.01$ , Male iPSCs vs Female iPSCs, Male ESCs vs Female ESCs, unpaired two-  
37 tailed t-test.

- 1 **(D)** RT-qPCR analysis for pluripotency-associated gene expression in iPSCs grown in S/L in  
2 both early and late passages. The expression values are represented as averages ( $\pm$ SEM) of  
3 male and female iPSC lines (three different lines each) in early passage (P8) and late passage  
4 (P14), respectively. Statistical significance was analysed using the unpaired, two-tailed t-test  
5 (\*\* $p < 0.01$ ).
- 6 **(E)** Western blot analysis for NANOG, DNMT3B and DUSP9 protein in iPSCs grown in S/L in  
7 both early and late passages. Lower panel: quantification using ACTIN as a loading control. The  
8 protein values are represented as averages ( $\pm$ SEM) of male and female iPSC lines ( $n=3$  lines  
9 each) in early passage (P6) and late passage (P13), respectively. Statistical significance was  
10 analysed using the unpaired, two-tailed t-test (\* $p < 0.05$ , \*\* $p < 0.01$ ).
- 11 **(F)** RT-qPCR analysis for pluripotency-associated gene expression during LIF withdrawal  
12 differentiation of both early passage and late passage iPSCs. Results are presented as  
13 averages ( $\pm$ SEM) of three male and three female iPSC lines in early passage (P8) and the  
14 same lines in late passage (P14), respectively. \*\* $p < 0.01$ , \*\*\* $p < 0.001$ , P8 Female iPSCs vs P8  
15 Male iPSCs. # $p < 0.05$ , ## $p < 0.01$ , P14 Female iPSCs vs P14 Male iPSCs. Two-way repeated-  
16 measures ANOVA with Bonferroni posttests.
- 17 **(G)** qPCR analysis for X-chromosome DNA copy number in both early passage and late  
18 passage iPSCs grown in S/L. X copy number are presented as the average ratios of gDNA  
19 quantities for four X-linked genes (*Tfe3*, *Bcor*, *Pdha1*, and *Mid1*, locations in X-chromosome  
20 shown in lower panel) to gDNA quantities for autosomal gene *Gapdh*.
- 21 **(H)** As in (C) but for male and female iPSC lines in early (P6) and late passage (P13). Growth  
22 curve: \* $p < 0.05$ , \*\*\* $p < 0.001$ , P6 Female iPSCs vs P6 Male iPSCs; ## $p < 0.01$ , ### $p < 0.001$ , P13  
23 Female iPSCs vs P13 Male iPSCs; two-way repeated-measures ANOVA with Bonferroni  
24 posttests. Td: \*\*\* $p < 0.01$ , P6 Female iPSCs vs P6 Male iPSCs; ### $p < 0.001$ , P13 Female iPSCs  
25 vs P13 Male iPSCs; unpaired two-tailed t-test.

26 **Figure 2. Sex-specific chromatin regulatory landscapes in mouse ESCs.**

- 27 **(A)** Differential chromatin accessibility analysis between female and male ESCs. Log<sub>2</sub> fold  
28 change (XX/XY) in reads per accessible region are plotted against the mean reads per ATAC-  
29 seq peak. Open chromatin regions that more open in female ESCs or in male ESCs  
30 ( $|\log_2\text{fold}| \geq 1$ , false discovery rate (FDR)  $\leq 0.05$ ) were defined as “XXgain” and “XYgain”,  
31 respectively.
- 32 **(B)** GO analysis of biological processes associated with chromatin more open in female  
33 (XXgain) or in male (XYgain) mouse ESCs.
- 34 **(C)** Venn diagrams showing the overlap between genes nearest to the “XXgain” regions and the  
35 DEGs between mouse XX and XY ESCs (DEGs =  $|\log_2\text{fold}| \geq \log_2 1.5$ , FDR  $\leq 0.05$ ).
- 36 **(D)** Integrated Genome Viewer (IGV) track images of ATAC-seq and RNA-seq signal for  
37 “XXgain” example regions. Differentially open regions are shaded.
- 38 **(E)** As in C for “XYgain” regions.
- 39 **(F)** As in D for “XYgain” regions.

1 **Figure 3. Identification of candidate regulators for sex-specific open chromatin.**

2 **(A-C)** Enriched motifs found in chromatin regions more open in XX ESCs (A), in XY ESCs (C),  
3 or both (B).

4 **(D)** Venn diagram showing the overlap between the ATAC-seq regions more open in XX ESCs  
5 with a motif KLF5, ESRRB and SOX2. The number of genes associated with all three motifs that  
6 show increased or decreased expression in XX ESCs is indicated.

7 **(E)** As in D for ATAC-seq regions more open in XY ESCs.

8 **Figure 4. Effects of *Zic3* heterozygous deletion on pluripotency exit.**

9 **(A)** Western blot analysis for ZIC3 (left) in iPSCs and ESCs grown in S/L. Right: quantification  
10 using ACTIN as loading control. ZIC3 protein values are represented as averages ( $\pm$ SEM) of  
11 male and female iPSC lines (three lines each), and male and female ESC lines (one line each).  
12  $**p < 0.01$ , Male iPSCs vs Female iPSCs, unpaired two-tailed t-test.

13 **(B)** Scheme of heterozygous *Zic3* deletion strategy in female XX ESCs followed by LIF  
14 withdrawal.

15 **(C)** RT-qPCR analysis for *Zic3* gene expression in two independent *Zic3*<sup>+/-</sup> ESC lines, *Zic3*<sup>+/+</sup>  
16 ESCs and XY ESCs all grown in S/L. The expression values are represented as averages  
17 ( $\pm$ SEM) of technical duplicates (n=1).

18 **(D)** RT-qPCR analysis for pluripotency-associated gene expression during LIF withdrawal in the  
19 two independent *Zic3*<sup>+/-</sup> XX ESC lines, the *Zic3*<sup>+/+</sup> XX parental ESC line and a XY ESC line.  
20 Results are presented as averages ( $\pm$ SEM) of technical duplicates (n=1).

21 **Figure 5. Transcriptional landscape of female ESCs differentiation in the absence of**  
22 **global DNA hypomethylation.**

23 **(A)** Scheme of *Dusp9* heterozygous deletion in female XX ESCs followed by LIF withdrawal  
24 differentiation.

25 **(B)** (i) Western blot analysis for DUSP9, ERK and pERK proteins in *Dusp9*<sup>+/-</sup> ESCs, *Dusp9*<sup>+/+</sup>  
26 ESCs and XY ESCs grown in S/L. (ii) Quantification of DUSP9 levels using ACTIN as a loading  
27 control and (iii) pERK levels using ERK as a loading control. DUSP9 expression values are  
28 represented as averages ( $\pm$ SEM) of the same lines in two independent western blot  
29 experiments.

30 **(C)** PCA of RNA-seq data for *Dusp9*<sup>+/-</sup> ESCs, *Dusp9*<sup>+/+</sup> ESCs and XY ESCs grown in S/L  
31 conditions or 24h after LIF withdrawal. The top 500 most variable genes were used in this  
32 analysis.

33 **(D)** Unsupervised hierarchical clustering of top 200 most variable genes in *Dusp9*<sup>+/-</sup> ESCs,  
34 *Dusp9*<sup>+/+</sup> ESCs and XY ESCs in the undifferentiated state.

35 **(E)** Venn diagram showing the overlap between the DEGs of *Dusp9*<sup>+/-</sup> ESCs with *Dusp9*<sup>+/+</sup>  
36 ESCs ( $|\log_2\text{fold}| \geq \log_2 1.5$ , FDR  $\leq 0.05$ ). The top enriched GO terms for biological processes for  
37 common DEGs are shown.

38 **(F)** Unsupervised hierarchical clustering of MAPK pathway related genes (defined in [11]) for  
39 *Dusp9*<sup>+/-</sup> ESCs, *Dusp9*<sup>+/+</sup> ESCs and XY ESCs in the undifferentiated state.

40 **(G)** Unsupervised hierarchical clustering of top 200 most variable genes for *Dusp9*<sup>+/-</sup> ESCs,  
41 *Dusp9*<sup>+/+</sup> ESCs and XY ESCs in the differentiated state after 24h of LIF withdrawal.

- 1 **(H)** Expression of *Prdm14* and *Nanog*. RNA-seq data (CPM) for *Dusp9*<sup>+/-</sup> ESCs, *Dusp9*<sup>+/+</sup>
- 2 ESCs and XY ESCs at 0h and 24h after LIF withdrawal.
- 3 **(I)** RT-qPCR validation of *Prdm14* and *Nanog* expression before and after LIF withdrawal.
- 4 Results are presented as averages ( $\pm$ SEM) of two independent experiments.
- 5 **(J)** Growth curves and doubling times of *Dusp9*<sup>+/-</sup> ESCs, *Dusp9*<sup>+/+</sup> ESCs and XY ESCs in S/L
- 6 condition. Cell were counted at the indicated time points and presented as fold changes relative
- 7 to averages ( $\pm$ SEM) at 0h (n=1).
- 8
- 9

## 1 REFERENCES

- 2 1. Avior Y, Sagi I, Benvenisty N. Pluripotent stem cells in disease modelling and drug  
3 discovery. *Nat Rev Mol Cell Biol.* 2016;17: 170–182.
- 4 2. Takahashi K, Yamanaka S. Induction of Pluripotent Stem Cells from Mouse Embryonic and  
5 Adult Fibroblast Cultures by Defined Factors. *Cell.* 2006;126: 663–676.
- 6 3. Bradley A, Evans M, Kaufman MH, Robertson E. Formation of germ-line chimaeras from  
7 embryo-derived teratocarcinoma cell lines. *Nature.* 1984;309: 255–256.
- 8 4. Ying Q-L, Wray J, Nichols J, Batlle-Morera L, Doble B, Woodgett J, et al. The ground state  
9 of embryonic stem cell self-renewal. *Nature.* 2008;453: 519–523.
- 10 5. Yagi M, Yamanaka S, Yamada Y. Epigenetic foundations of pluripotent stem cells that  
11 recapitulate in vivo pluripotency. *Lab Invest.* 2017;97: 1133–1141.
- 12 6. Schulz EG. X-chromosome dosage as a modulator of pluripotency, signalling and  
13 differentiation? *Philos Trans R Soc Lond B Biol Sci.* 2017;372. doi:10.1098/rstb.2016.0366
- 14 7. Ronen D, Benvenisty N. Sex-dependent gene expression in human pluripotent stem cells.  
15 *Cell Rep.* 2014;8: 923–932.
- 16 8. Bruck T, Yanuka O, Benvenisty N. Human pluripotent stem cells with distinct X inactivation  
17 status show molecular and cellular differences controlled by the X-Linked ELK-1 gene. *Cell*  
18 *Rep.* 2013;4: 262–270.
- 19 9. Zvetkova I, Apedaile A, Ramsahoye B, Mermoud JE, Crompton LA, John R, et al. Global  
20 hypomethylation of the genome in XX embryonic stem cells. *Nat Genet.* 2005;37: 1274–  
21 1279.
- 22 10. Ooi SK, Wolf D, Hartung O, Agarwal S, Daley GQ, Goff SP, et al. Dynamic instability of  
23 genomic methylation patterns in pluripotent stem cells. *Epigenetics Chromatin.* 2010;3: 17.
- 24 11. Schulz EG, Meisig J, Nakamura T, Okamoto I, Sieber A, Picard C, et al. The two active X  
25 chromosomes in female ESCs block exit from the pluripotent state by modulating the ESC  
26 signaling network. *Cell Stem Cell.* 2014;14: 203–216.
- 27 12. Hackett JA, Dietmann S, Murakami K, Down TA, Leitch HG, Azim Surani M. Synergistic  
28 Mechanisms of DNA Demethylation during Transition to Ground-State Pluripotency. *Stem*  
29 *Cell Reports.* 2013;1: 518–531.
- 30 13. Choi J, Clement K, Huebner AJ, Webster J, Rose CM, Brumbaugh J, et al. DUSP9  
31 Modulates DNA Hypomethylation in Female Mouse Pluripotent Stem Cells. *Cell Stem Cell.*  
32 2017;20: 706–719.e7.
- 33 14. Choi J, Huebner AJ, Clement K, Walsh RM, Savol A, Lin K, et al. Prolonged Mek1/2  
34 suppression impairs the developmental potential of embryonic stem cells. *Nature.*  
35 2017;548: 219–223.
- 36 15. Yagi M, Kishigami S, Tanaka A, Semi K, Mizutani E, Wakayama S, et al. Derivation of  
37 ground-state female ES cells maintaining gamete-derived DNA methylation. *Nature.*  
38 2017;548: 224–227.

- 1 16. Shirane K, Kurimoto K, Yabuta Y, Yamaji M, Satoh J, Ito S, et al. Global Landscape and  
2 Regulatory Principles of DNA Methylation Reprogramming for Germ Cell Specification by  
3 Mouse Pluripotent Stem Cells. *Dev Cell*. 2016;39: 87–103.
- 4 17. Mak W. Reactivation of the Paternal X Chromosome in Early Mouse Embryos. *Science*.  
5 2004;303: 666–669.
- 6 18. Maherali N, Sridharan R, Xie W, Utikal J, Eminli S, Arnold K, et al. Directly reprogrammed  
7 fibroblasts show global epigenetic remodeling and widespread tissue contribution. *Cell*  
8 *Stem Cell*. 2007;1: 55–70.
- 9 19. Okamoto I, Otte AP, Allis CD, Reinberg D, Heard E. Epigenetic dynamics of imprinted X  
10 inactivation during early mouse development. *Science*. 2004;303: 644–649.
- 11 20. Pasque V, Plath K. X chromosome reactivation in reprogramming and in development. *Curr*  
12 *Opin Cell Biol*. 2015;37: 75–83.
- 13 21. Habibi E, Brinkman AB, Arand J, Kroeze LI, Kerstens HHD, Matarese F, et al. Whole-  
14 Genome Bisulfite Sequencing of Two Distinct Interconvertible DNA Methylomes of Mouse  
15 Embryonic Stem Cells. *Cell Stem Cell*. 2013;13: 360–369.
- 16 22. Milagre I, Stubbs TM, King MR, Spindel J, Santos F, Krueger F, et al. Gender Differences  
17 in Global but Not Targeted Demethylation in iPSC Reprogramming. *Cell Rep*. 2017;18:  
18 1079–1089.
- 19 23. Robertson EJ, Evans MJ, Kaufman MH. X-chromosome instability in pluripotential stem cell  
20 lines derived from parthenogenetic embryos. *J Embryol Exp Morphol*. 1983;74: 297–309.
- 21 24. Rastan S, Robertson EJ. X-chromosome deletions in embryo-derived (EK) cell lines  
22 associated with lack of X-chromosome inactivation. *J Embryol Exp Morphol*. 1985;90: 379–  
23 388.
- 24 25. Chen G, Schell JP, Benitez JA, Petropoulos S, Yilmaz M, Reinius B, et al. Single-cell  
25 analyses of X Chromosome inactivation dynamics and pluripotency during differentiation.  
26 *Genome Res*. 2016;26: 1342–1354.
- 27 26. Carey BW, Markoulaki S, Beard C, Hanna J, Jaenisch R. Single-gene transgenic mouse  
28 strains for reprogramming adult somatic cells. *Nat Methods*. 2010;7: 56–59.
- 29 27. De Los Angeles A, Ferrari F, Xi R, Fujiwara Y, Benvenisty N, Deng H, et al. Hallmarks of  
30 pluripotency. *Nature*. 2015;525: 469–478.
- 31 28. Burgoyne PS, Thornhill AR, Boudrean SK, Darling SM, Bishop CE, Evans EP. The genetic  
32 basis of XX-XY differences present before gonadal sex differentiation in the mouse. *Philos*  
33 *Trans R Soc Lond B Biol Sci*. 1995;350: 253–60 discussion 260–1.
- 34 29. Guo G, Yang J, Nichols J, Hall JS, Eyres I, Mansfield W, et al. Klf4 reverts developmentally  
35 programmed restriction of ground state pluripotency. *Development*. 2009;136: 1063–1069.
- 36 30. Pasque V, Tchieu J, Karnik R, Uyeda M, Sadhu Dimashkie A, Case D, et al. X  
37 chromosome reactivation dynamics reveal stages of reprogramming to pluripotency. *Cell*.  
38 2014;159: 1681–1697.



- 1 31. Buenrostro JD, Giresi PG, Zaba LC, Chang HY, Greenleaf WJ. Transposition of native  
2 chromatin for fast and sensitive epigenomic profiling of open chromatin, DNA-binding  
3 proteins and nucleosome position. *Nat Methods*. 2013;10: 1213–1218.
- 4 32. Xu J, Carter AC, Gendrel A-V, Attia M, Loftus J, Greenleaf WJ, et al. Landscape of  
5 monoallelic DNA accessibility in mouse embryonic stem cells and neural progenitor cells.  
6 *Nat Genet*. 2017;49: 377–386.
- 7 33. Bernstein BE, Mikkelsen TS, Xie X, Kamal M, Huebert DJ, Cuff J, et al. A bivalent  
8 chromatin structure marks key developmental genes in embryonic stem cells. *Cell*.  
9 2006;125: 315–326.
- 10 34. Smith A. Formative pluripotency: the executive phase in a developmental continuum.  
11 *Development*. 2017;144: 365–373.
- 12 35. Martello G, Smith A. The nature of embryonic stem cells. *Annu Rev Cell Dev Biol*. 2014;30:  
13 647–675.
- 14 36. Okamoto K, Okazawa H, Okuda A, Sakai M, Muramatsu M, Hamada H. A novel octamer  
15 binding transcription factor is differentially expressed in mouse embryonic cells. *Cell*.  
16 1990;60: 461–472.
- 17 37. Schöler HR, Dressler GR, Balling R, Rohdewohld H, Gruss P. Oct-4: a germline-specific  
18 transcription factor mapping to the mouse t-complex. *EMBO J*. 1990;9: 2185–2195.
- 19 38. Pardo M, Lang B, Yu L, Prosser H, Bradley A, Babu MM, et al. An expanded Oct4  
20 interaction network: implications for stem cell biology, development, and disease. *Cell Stem*  
21 *Cell*. 2010;6: 382–395.
- 22 39. van den Berg DLC, Snoek T, Mullin NP, Yates A, Bezstarosti K, Demmers J, et al. An Oct4-  
23 centered protein interaction network in embryonic stem cells. *Cell Stem Cell*. 2010;6: 369–  
24 381.
- 25 40. Chen X, Xu H, Yuan P, Fang F, Huss M, Vega VB, et al. Integration of External Signaling  
26 Pathways with the Core Transcriptional Network in Embryonic Stem Cells. *Cell*. 2008;133:  
27 1106–1117.
- 28 41. Chambers I, Silva J, Colby D, Nichols J, Nijmeijer B, Robertson M, et al. Nanog safeguards  
29 pluripotency and mediates germline development. *Nature*. 2007;450: 1230–1234.
- 30 42. Lim LS, Loh Y-H, Zhang W, Li Y, Chen X, Wang Y, et al. Zic3 is required for maintenance  
31 of pluripotency in embryonic stem cells. *Mol Biol Cell*. 2007;18: 1348–1358.
- 32 43. Shaulian E, Karin M. AP-1 as a regulator of cell life and death. *Nat Cell Biol*. 2002;4: E131–  
33 E136.
- 34 44. Shaulian E. AP-1 — The Jun proteins: Oncogenes or tumor suppressors in disguise? *Cell*  
35 *Signal*. 2010;22: 894–899.
- 36 45. Yang S-H, Kalkan T, Morrisroe C, Smith A, Sharrocks AD. A genome-wide RNAi screen  
37 reveals MAP kinase phosphatases as key ERK pathway regulators during embryonic stem  
38 cell differentiation. *PLoS Genet*. 2012;8: e1003112.

- 1 46. Karin M. The Regulation of AP-1 Activity by Mitogen-activated Protein Kinases. *J Biol*  
2 *Chem.* 1995;270: 16483–16486.
- 3 47. Moya IM, Halder G. The Hippo pathway in cellular reprogramming and regeneration of  
4 different organs. *Curr Opin Cell Biol.* 2016;43: 62–68.
- 5 48. Tamm C, Böwer N, Annerén C. Regulation of mouse embryonic stem cell self-renewal by a  
6 Yes-YAP-TEAD2 signaling pathway downstream of LIF. *J Cell Sci.* 2011;124: 1136–1144.
- 7 49. Roychoudhuri R, Hirahara K, Mousavi K, Clever D, Klebanoff CA, Bonelli M, et al. BACH2  
8 represses effector programs to stabilize T(reg)-mediated immune homeostasis. *Nature.*  
9 2013;498: 506–510.
- 10 50. Jang E, Lee HR, Lee GH, Oh A-R, Cha J-Y, Igarashi K, et al. Bach2 represses the AP-1-  
11 driven induction of interleukin-2 gene transcription in CD4<sup>+</sup> T cells. *BMB Rep.* 2017;50:  
12 472–477.
- 13 51. Itoh-Nakadai A, Matsumoto M, Kato H, Sasaki J, Uehara Y, Sato Y, et al. A Bach2-Cebp  
14 Gene Regulatory Network for the Commitment of Multipotent Hematopoietic Progenitors.  
15 *Cell Rep.* 2017;18: 2401–2414.
- 16 52. Hoshino H, Igarashi K. Expression of the oxidative stress-regulated transcription factor  
17 bach2 in differentiating neuronal cells. *J Biochem.* 2002;132: 427–431.
- 18 53. Lim LS, Hong FH, Kunarso G, Stanton LW. The pluripotency regulator Zic3 is a direct  
19 activator of the Nanog promoter in ESCs. *Stem Cells.* 2010;28: 1961–1969.
- 20 54. Lee JT, Lu N. Targeted Mutagenesis of Tsix Leads to Nonrandom X Inactivation. *Cell.*  
21 1999;99: 47–57.
- 22 55. Li Z, Fei T, Zhang J, Zhu G, Wang L, Lu D, et al. BMP4 Signaling Acts via dual-specificity  
23 phosphatase 9 to control ERK activity in mouse embryonic stem cells. *Cell Stem Cell.*  
24 2012;10: 171–182.
- 25 56. Galupa R, Heard E. X-chromosome inactivation: new insights into cis and trans regulation.  
26 *Curr Opin Genet Dev.* 2015;31: 57–66.
- 27 57. Eggan K, Akutsu H, Hochedlinger K, Rideout W 3rd, Yanagimachi R, Jaenisch R. X-  
28 Chromosome inactivation in cloned mouse embryos. *Science.* 2000;290: 1578–1581.
- 29 58. Patel S, Bonora G, Sahakyan A, Kim R, Chronis C, Langerman J, et al. Human Embryonic  
30 Stem Cells Do Not Change Their X Inactivation Status during Differentiation. *Cell Rep.*  
31 2017;18: 54–67.
- 32 59. Mittwoch U. Blastocysts prepare for the race to be male. *Hum Reprod.* 1993;8: 1550–1555.
- 33 60. Chakraborty D, Paszkowski-Rogacz M, Berger N, Ding L, Mircetic J, Fu J, et al. lncRNA  
34 Panc1 Maintains Mouse Embryonic Stem Cell Identity by Regulating TOBF1 Recruitment  
35 to Oct-Sox Sequences in Early G1. *Cell Rep.* 2017;21: 3012–3021.
- 36 61. Beddington RS, Robertson EJ. An assessment of the developmental potential of embryonic  
37 stem cells in the midgestation mouse embryo. *Development.* 1989;105: 733–737.

- 1 62. Ng RK, Dean W, Dawson C, Lucifero D, Madeja Z, Reik W, et al. Epigenetic restriction of  
2 embryonic cell lineage fate by methylation of Elf5. *Nat Cell Biol.* 2008;10: 1280–1290.
- 3 63. Chang G, Gao S, Hou X, Xu Z, Liu Y, Kang L, et al. High-throughput sequencing reveals  
4 the disruption of methylation of imprinted gene in induced pluripotent stem cells. *Cell Res.*  
5 2014;24: 293–306.
- 6 64. Yamaji M, Ueda J, Hayashi K, Ohta H, Yabuta Y, Kurimoto K, et al. PRDM14 ensures naive  
7 pluripotency through dual regulation of signaling and epigenetic pathways in mouse  
8 embryonic stem cells. *Cell Stem Cell.* 2013;12: 368–382.
- 9 65. Chambers I, Colby D, Robertson M, Nichols J, Lee S, Tweedie S, et al. Functional  
10 expression cloning of Nanog, a pluripotency sustaining factor in embryonic stem cells. *Cell.*  
11 2003;113: 643–655.
- 12 66. Lin KC, Park HW, Guan K-L. Regulation of the Hippo Pathway Transcription Factor TEAD.  
13 *Trends Biochem Sci.* 2017;42: 862–872.
- 14 67. Ying Q-L, Nichols J, Evans EP, Smith AG. Changing potency by spontaneous fusion.  
15 *Nature.* 2002;416: 545–548.
- 16 68. Branco MR, King M, Perez-Garcia V, Bogutz AB, Caley M, Fineberg E, et al. Maternal DNA  
17 Methylation Regulates Early Trophoblast Development. *Dev Cell.* 2016;36: 152–163.
- 18 69. Fulco CP, Munschauer M, Anyoha R, Munson G, Grossman SR, Perez EM, et al.  
19 Systematic mapping of functional enhancer-promoter connections with CRISPR  
20 interference. *Science.* 2016;354: 769–773.
- 21 70. Silva J, Nichols J, Theunissen TW, Guo G, van Oosten AL, Barrandon O, et al. Nanog Is  
22 the Gateway to the Pluripotent Ground State. *Cell.* 2009;138: 722–737.
- 23 71. Chen Y, Lun ATL, Smyth GK. From reads to genes to pathways: differential expression  
24 analysis of RNA-Seq experiments using Rsubread and the edgeR quasi-likelihood pipeline.  
25 *F1000Res.* 2016;5: 1438.
- 26 72. Heberle H, Meirelles GV, da Silva FR, Telles GP, Minghim R. InteractiVenn: a web-based  
27 tool for the analysis of sets through Venn diagrams. *BMC Bioinformatics.* 2015;16: 169.
- 28 73. Lee J, Christoforo G, Christoforo G, Foo CS, Probert C, Kundaje A, et al.  
29 kundajelab/atac\_dnase\_pipelines: 0.3.3 [Internet]. 2016. doi:10.5281/zenodo.211733
- 30 74. Zhang Y, Liu T, Meyer CA, Eeckhoutte J, Johnson DS, Bernstein BE, et al. Model-based  
31 analysis of ChIP-Seq (MACS). *Genome Biol.* 2008;9: R137.
- 32 75. Stark R, Brown G. DiffBind: differential binding analysis of ChIP-Seq peak data. R package  
33 version. [bioconductor.statistik.tu-dortmund.de](http://bioconductor.statistik.tu-dortmund.de); 2011; Available:  
34 [https://bioconductor.statistik.tu-](https://bioconductor.statistik.tu-dortmund.de/packages/2.13/bioc/vignettes/DiffBind/inst/doc/DiffBind.pdf)  
35 [dortmund.de/packages/2.13/bioc/vignettes/DiffBind/inst/doc/DiffBind.pdf](https://bioconductor.statistik.tu-dortmund.de/packages/2.13/bioc/vignettes/DiffBind/inst/doc/DiffBind.pdf)
- 36 76. McLean CY, Bristor D, Hiller M, Clarke SL, Schaar BT, Lowe CB, et al. GREAT improves  
37 functional interpretation of cis-regulatory regions. *Nat Biotechnol.* 2010;28: 495–501.
- 38 77. Heinz S, Benner C, Spann N, Bertolino E, Lin YC, Laslo P, et al. Simple combinations of

1 lineage-determining transcription factors prime cis-regulatory elements required for  
2 macrophage and B cell identities. *Mol Cell*. 2010;38: 576–589.

3

**A**

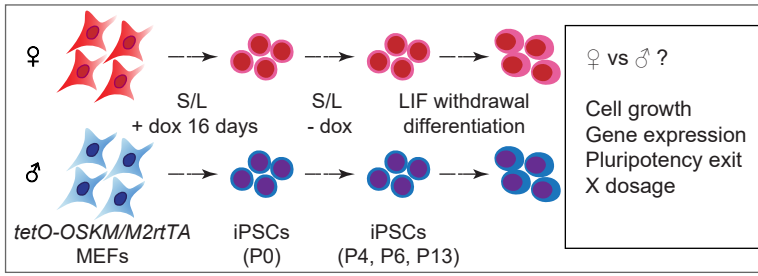

**B**

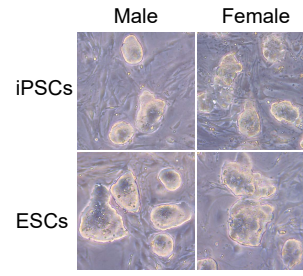

**C**

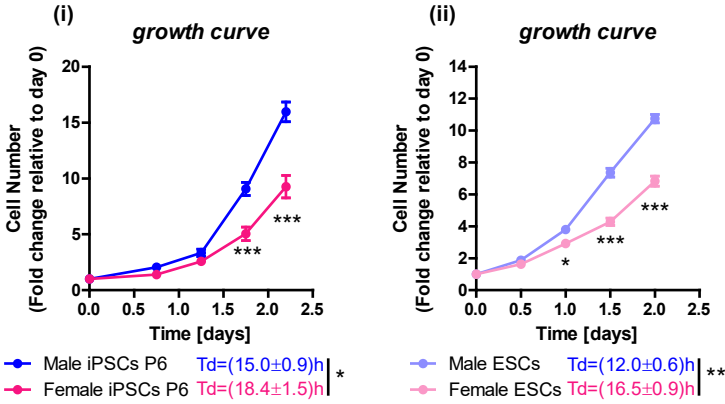

**D**

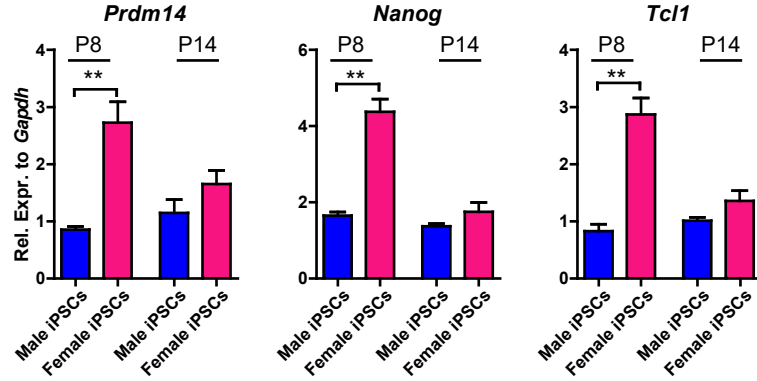

**E**

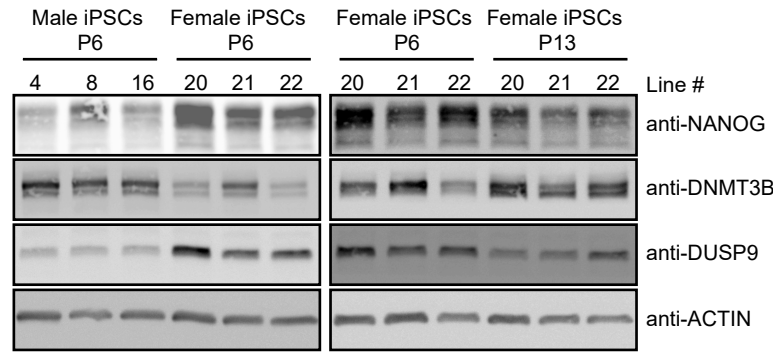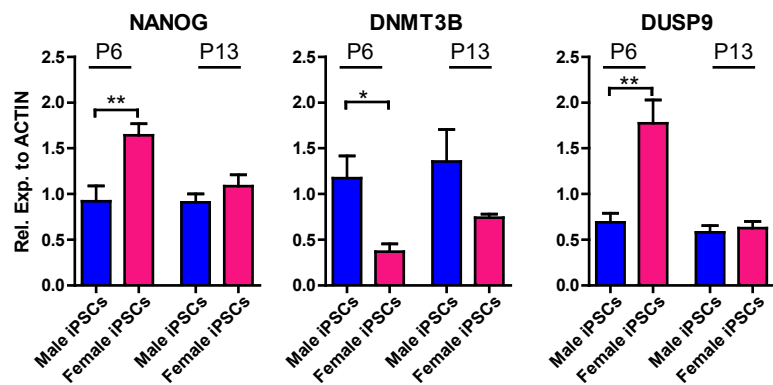

**F**

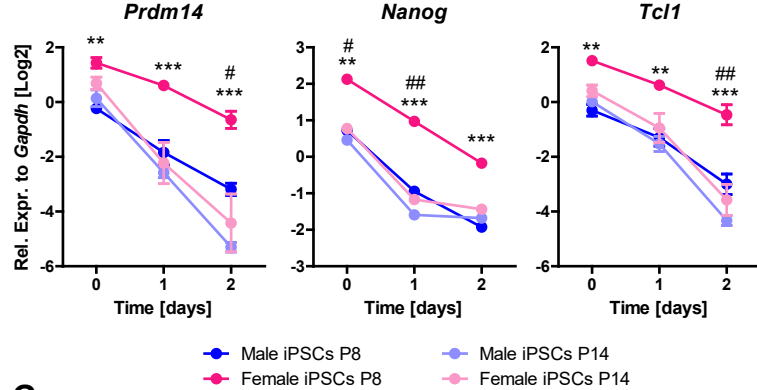

**G**

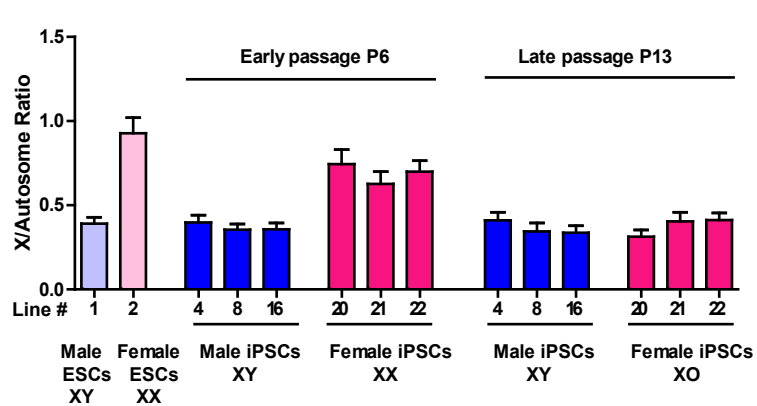

**H**

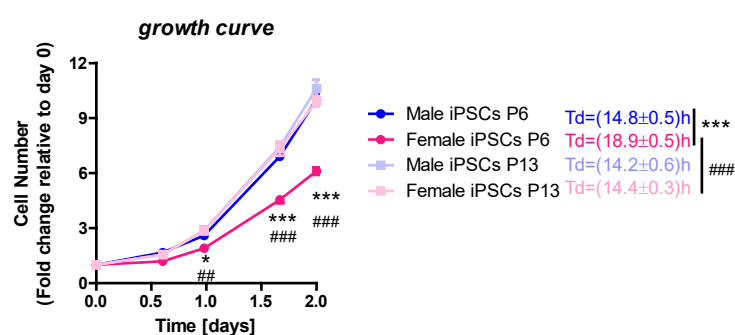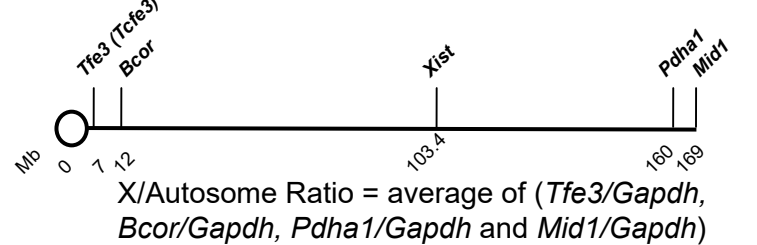

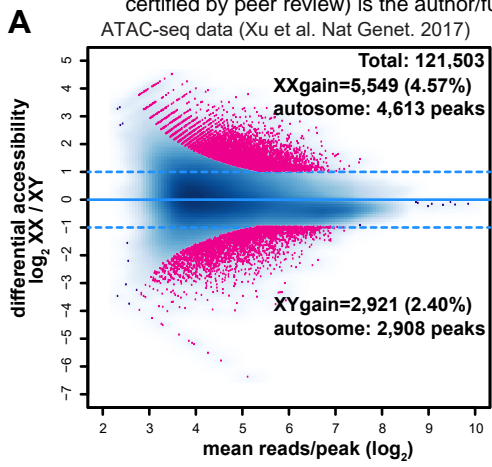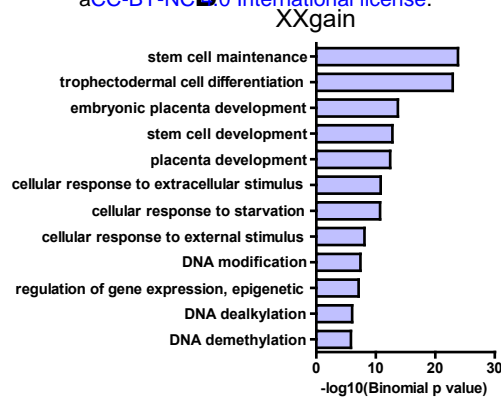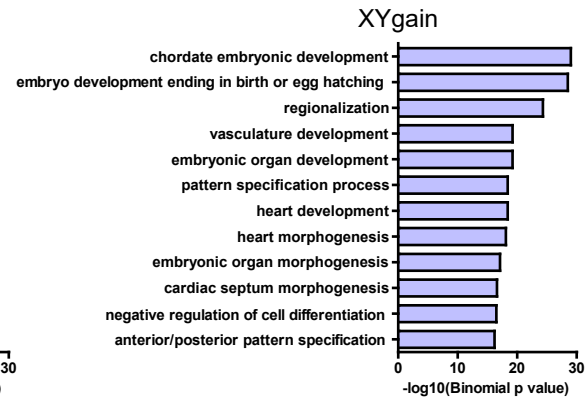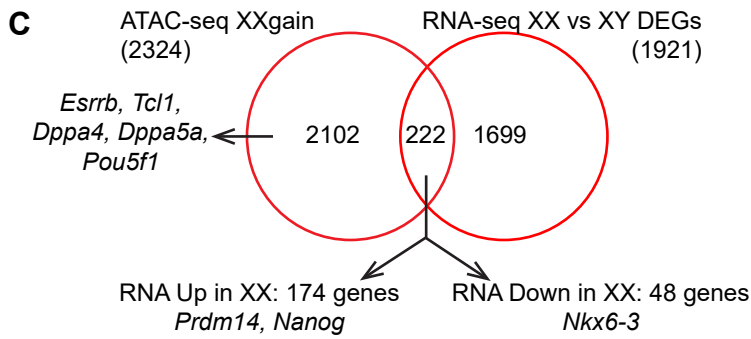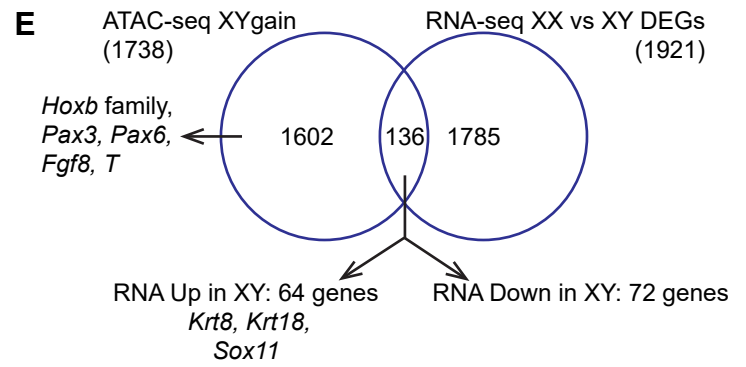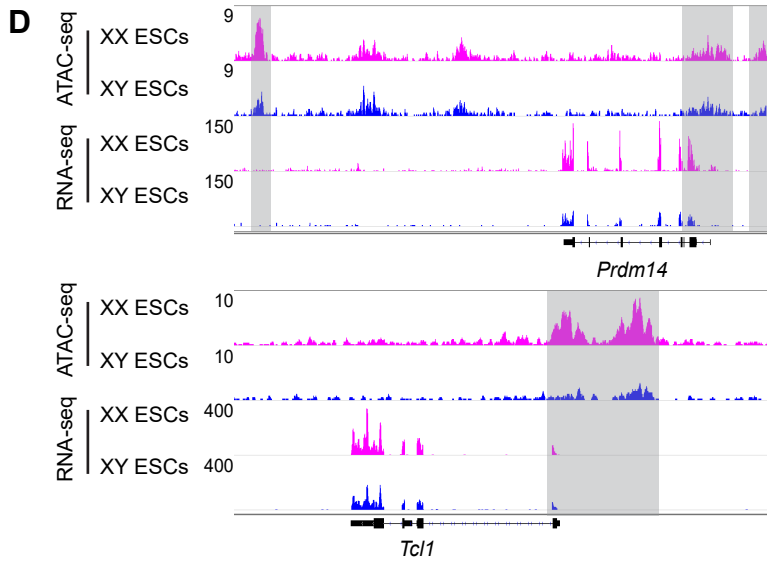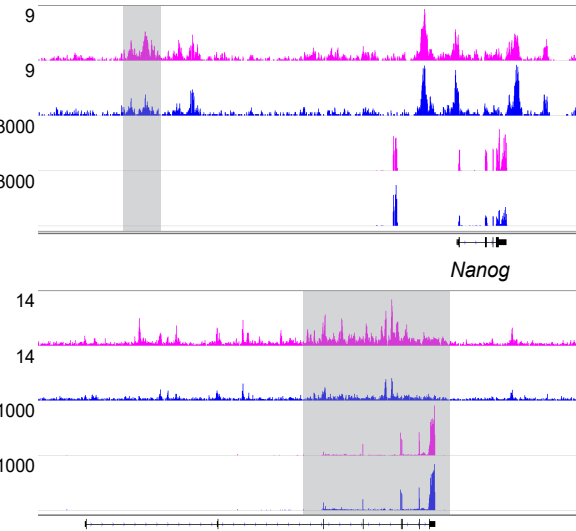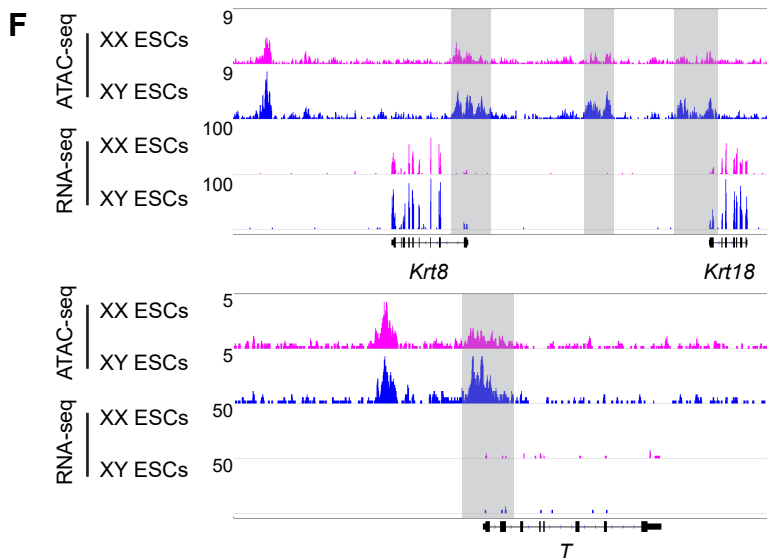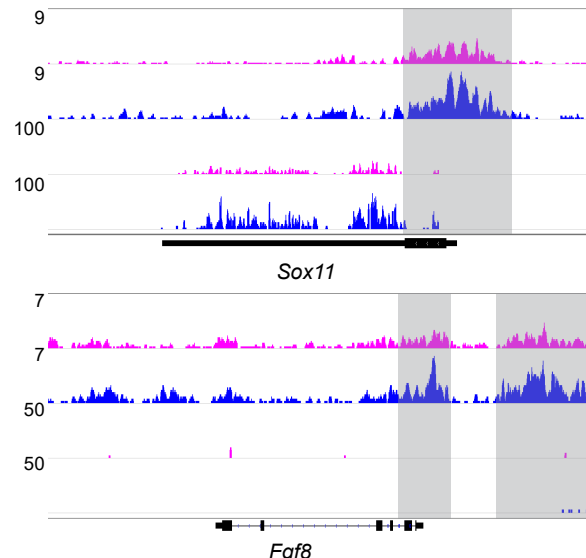

**A** XXgain:4613 peaks

| Motif | Name                | p-value | % of targets with Motif |
|-------|---------------------|---------|-------------------------|
|       | KLF5                | 1e-417  | 61.52%                  |
|       | ESRRB               | 1e-202  | 35.33%                  |
|       | SOX3                | 1e-172  | 58.44%                  |
|       | OCT4-SOX2-TCF-NANOG | 1e-171  | 13.18%                  |
|       | SOX2                | 1e-170  | 37.59%                  |
|       | ZIC3                | 1e-58   | 24.00%                  |

**C** XYgain: 2908 peaks

| Motif | Name    | p-value | % of targets with Motif |
|-------|---------|---------|-------------------------|
|       | JUN-AP1 | 1e-172  | 18.99%                  |
|       | TEAD    | 1e-166  | 32.78%                  |
|       | FRA2    | 1e-159  | 26.18%                  |
|       | BACH2   | 1e-73   | 12.38%                  |

**B**

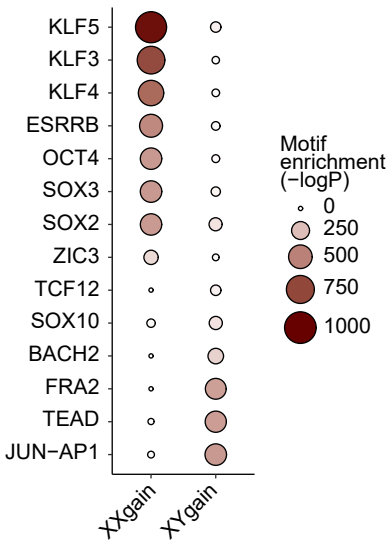

**D**

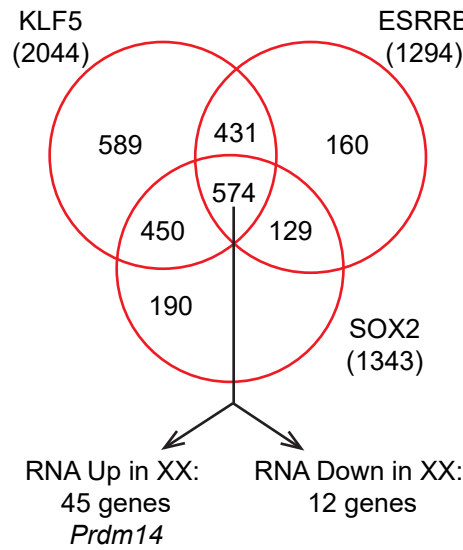

**E**

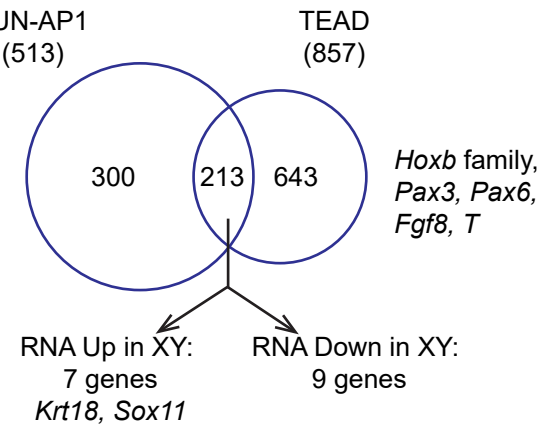

## Figure 4

**A**

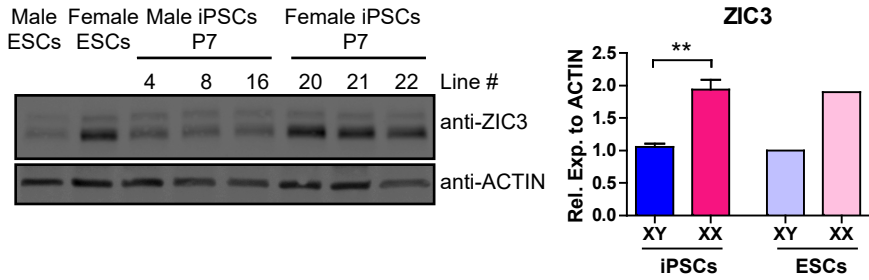

**B**

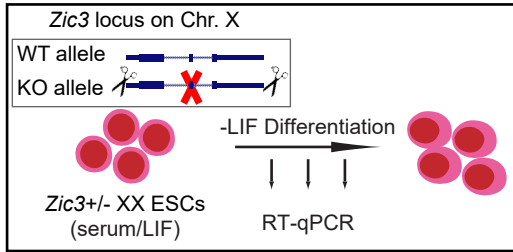

**C**

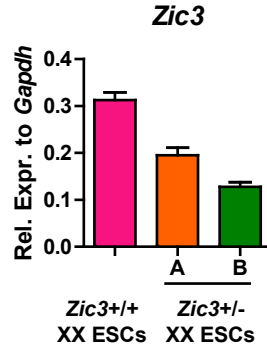

**D**

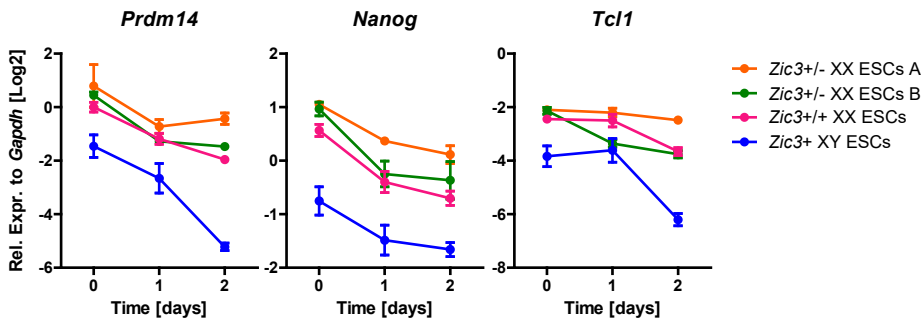



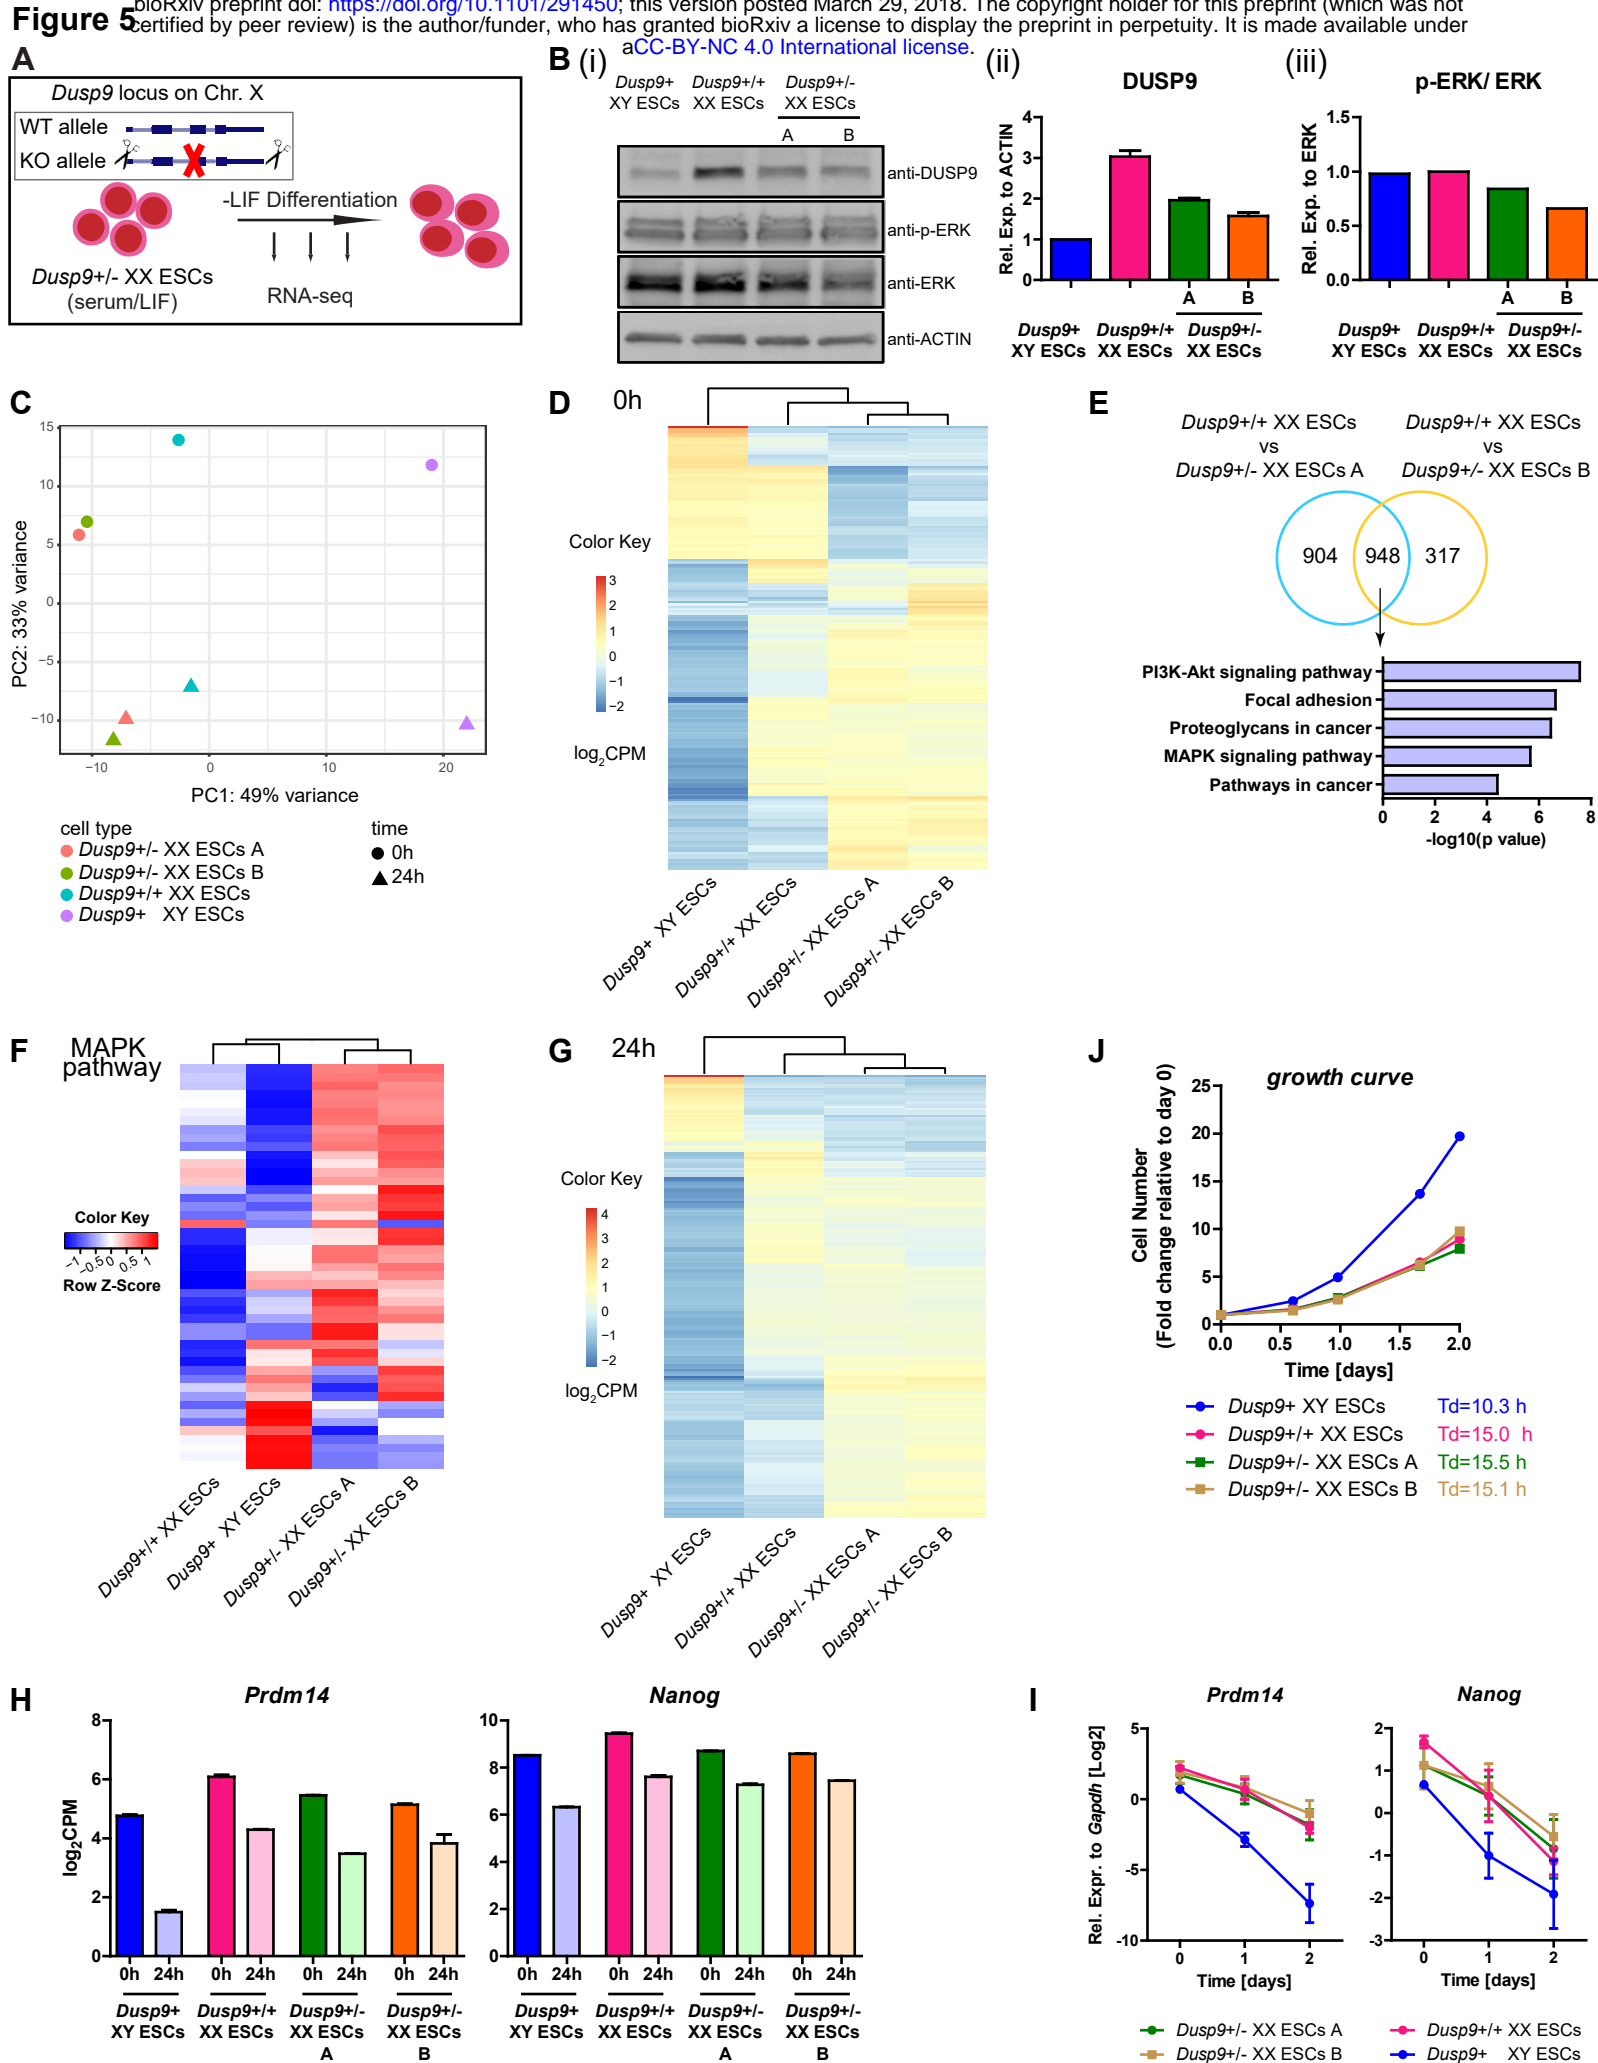

Source: http://biorxiv.org/content/10.1101/291450v1.full.pdf
